# Supplementary material
Source: PubMed Central journal article supplement (PMC6682113)
Supplement: ao9b01106_si_001.pdf [file ao9b01106_si_001.pdf]

Electronic Supporting Information for  
**Small-molecule poly (ADP-ribose) polymerase (PARP) and PD-  
L1 inhibitor conjugates as dual-action anticancer  
agents**

Samuel Ofori and Samuel G. Awuah\*

Department of Chemistry, University of Kentucky, Lexington Kentucky 40506, United States

Correspondence to: awuah@uky.edu

**For Table of Contents Only**

|                                                                                          |     |
|------------------------------------------------------------------------------------------|-----|
| Figure S1. <sup>1</sup> H NMR spectrum of <b>6</b> in CDCl <sub>3</sub> .....            | S4  |
| Figure S2. <sup>13</sup> C NMR spectrum of <b>6</b> in CDCl <sub>3</sub> .....           | S4  |
| Figure S3. <sup>1</sup> H NMR spectrum of <b>8</b> in DMSO- <i>d</i> <sub>6</sub> .....  | S5  |
| Figure S4. <sup>13</sup> C NMR spectrum of <b>8</b> in DMSO- <i>d</i> <sub>6</sub> ..... | S5  |
| Figure S5. <sup>1</sup> H NMR spectrum of <b>11</b> in CDCl <sub>3</sub> .....           | S6  |
| Figure S6. <sup>13</sup> C NMR spectrum of <b>11</b> in CDCl <sub>3</sub> .....          | S6  |
| Figure S7. <sup>1</sup> H NMR spectrum of <b>13</b> in CDCl <sub>3</sub> .....           | S7  |
| Figure S8. <sup>13</sup> C NMR spectrum of <b>13</b> in CDCl <sub>3</sub> .....          | S7  |
| Figure S9. <sup>1</sup> H NMR spectrum of <b>1</b> in DMSO- <i>d</i> <sub>6</sub> .....  | S8  |
| Figure S10. <sup>13</sup> C NMR spectrum of <b>1</b> in CDCl <sub>3</sub> .....          | S8  |
| Figure S11. <sup>1</sup> H NMR spectrum of <b>2</b> in CDCl <sub>3</sub> .....           | S9  |
| Figure S12. <sup>13</sup> C NMR spectrum of <b>2</b> in CDCl <sub>3</sub> .....          | S9  |
| Figure S13. <sup>1</sup> H NMR spectrum of <b>3</b> in CDCl <sub>3</sub> .....           | S10 |
| Figure S14. <sup>13</sup> C NMR spectrum of <b>3</b> in CDCl <sub>3</sub> .....          | S10 |
| Figure S15: HPLC Chromatogram of Compound <b>1</b> .....                                 | S11 |
| Figure S16: HPLC Chromatogram of Compound <b>2</b> .....                                 | S11 |
| Figure S17: HPLC Chromatogram of Compound <b>3</b> .....                                 | S12 |
| Figure S18: Dose-response curves of MDA-MB-231 cells in response to compounds .....      | S13 |

|                                                                                                                                                     |     |
|-----------------------------------------------------------------------------------------------------------------------------------------------------|-----|
| Figure S19: Dose-response curves of A2780 cells in response to compounds .....                                                                      | S13 |
| Figure S20: Dose-response curves of OVCAR8 cells in response to compounds .....                                                                     | S14 |
| Figure S21: Dose-response curves of SKOV3 cells in response to compounds .....                                                                      | S14 |
| Figure S22: Dose-response curves of H460 cells in response to compounds.....                                                                        | S15 |
| Figure S23: Dose-response curves of HCC1937 cells in response to compounds .....                                                                    | S15 |
| Figure S24: Combination Index values for olaparib-BMS001 combinations presented as function of fraction affected (Fa) for OVCAR8 cells .....        | S16 |
| Figure S25: The combination Index values for olaparib-BMS001 combinations presented as function of fraction affected (Fa) for MDA-MB-231 cells..... | S16 |
| Figure S26: The combination Index values for olaparib-BMS001 combination presented as function of fraction affected (Fa) for HCC1937 cells.....     | S17 |
| Figure S27: The combination Index values for olaparib-BMS001 combinations presented as afunction of fraction affected (Fa) for A2780 cells.....     | S17 |
| Figure S28: The combination Index values for olaparib-BMS001 combinations presented as a function of fraction affected (Fa) for H460cells. ....     | S18 |
| Figure S29: Dose-Response curve of OVCAR8 cell lines for Olaparib or BMS given as a monotherapy, or in combination. ....                            | S19 |
| Figure S30: Dose-Response curve of MDA-MB-231cell lines for Olaparib or BMS given as amonotherapy, or in combination .....                          | S19 |
| Figure S31: Dose-Response curve of HCC1937 cell lines for Olaparib or BMS given as a monotherapy, or in combination.....                            | S20 |
| Figure S32: Dose-Response curve of HCC1937 cell lines for Olaparib or BMS given as a monotherapy, or in combination .....                           | S20 |
| Figure S33: Dose-Response curve of H460 cell lines for Olaparib or BMS given as a monotherapy, or in combination.....                               | S21 |
| Figure S34: Apoptosis induced by olaparib in MDA-MB-231 cells .....                                                                                 | S22 |
| Figure S35: UV absorption profile of conjugate <b>2</b> in PBS .....                                                                                | S23 |
| Figure S36: UV absorption profile of conjugate <b>3</b> in PBS .....                                                                                | S23 |
| Figure S37: UV absorption profile of conjugate <b>2</b> in DMEM .....                                                                               | S24 |
| Figure S38: UV absorption profile of conjugate <b>3</b> in DMEM .....                                                                               | S24 |
| Figure S39: UV absorption profile of conjugate <b>1</b> in BSA .....                                                                                | S25 |
| Figure S40: Mass spectra of an extract of Conjugate <b>1</b> -BSA mix.....                                                                          | S25 |

|                                                                                               |     |
|-----------------------------------------------------------------------------------------------|-----|
| Figure S41: UV absorption profile of conjugate <b>2</b> in BSA .....                          | S26 |
| Figure S42: Mass spectra of an extract of Conjugate <b>2</b> -BSA mix.....                    | S26 |
| Figure S43: UV absorption profile of conjugate <b>3</b> in BSA .....                          | S27 |
| Figure S44: Mass spectra of an extract of Conjugate <b>1</b> -BSA mix.....                    | S27 |
| Figure S45: UV absorption profile of conjugate <b>1</b> incubated with liver microsomes.....  | S28 |
| Figure S46: UV absorption profile of conjugate <b>2</b> incubated with liver microsomes ..... | S28 |
| Figure S47: UV absorption profile of conjugate <b>3</b> incubated with liver microsomes ..... | S29 |
| Figure S48: Mass spectra of an extract of Conjugate <b>3</b> -microsome mix after 45mins..... | S29 |

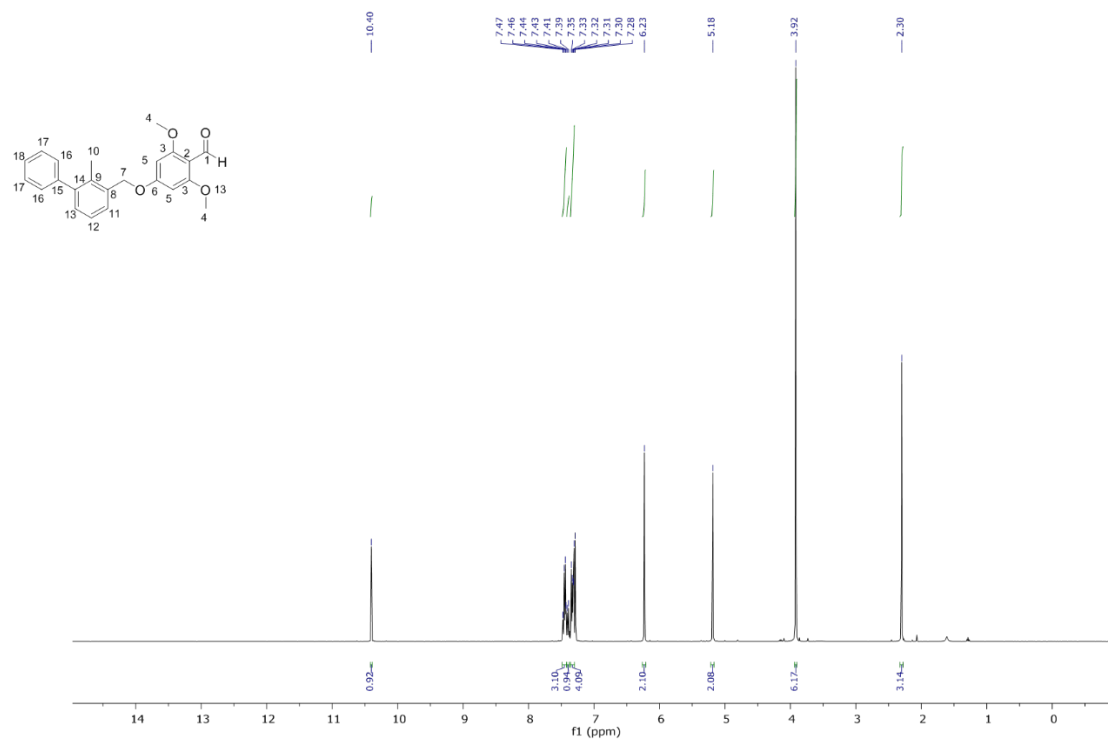

**Figure S1.**  $^1\text{H}$  NMR spectrum of **6** (400 MHz,  $\text{CDCl}_3$ )

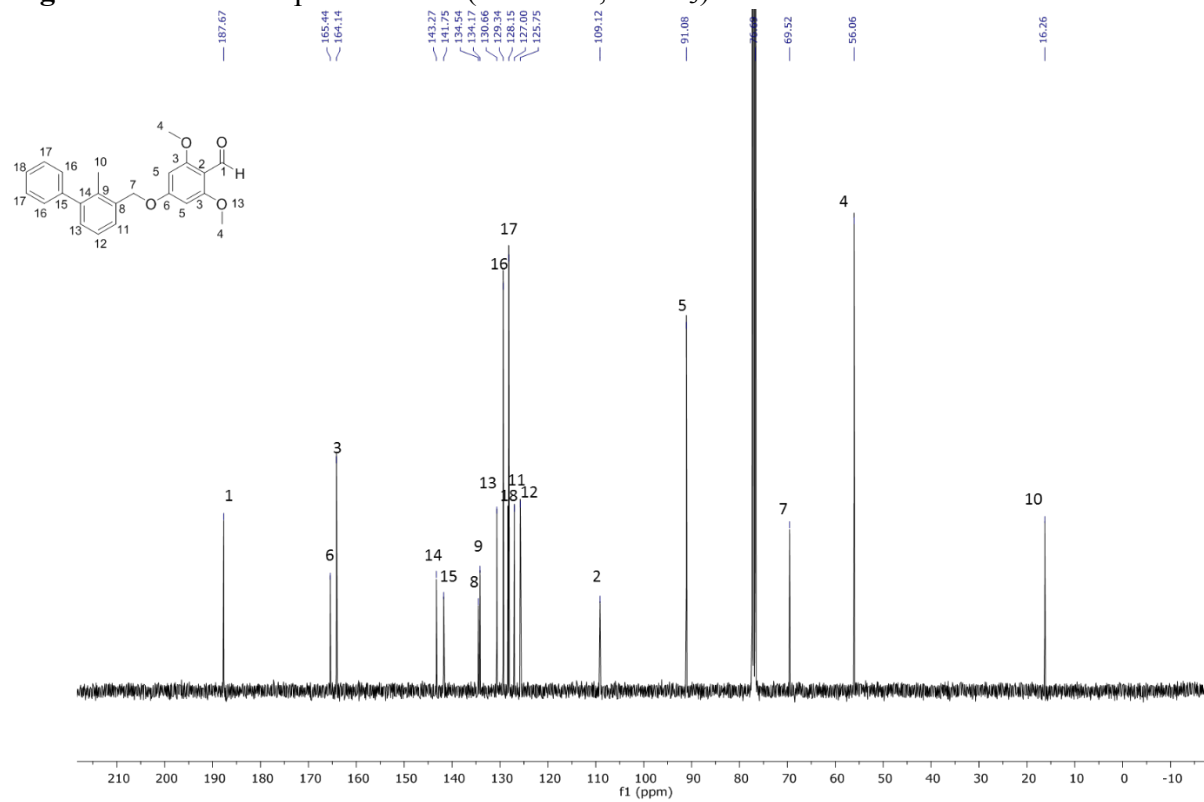

**Figure S2.**  $^{13}\text{C}$  NMR spectrum of **6** (400 MHz,  $\text{CDCl}_3$ )

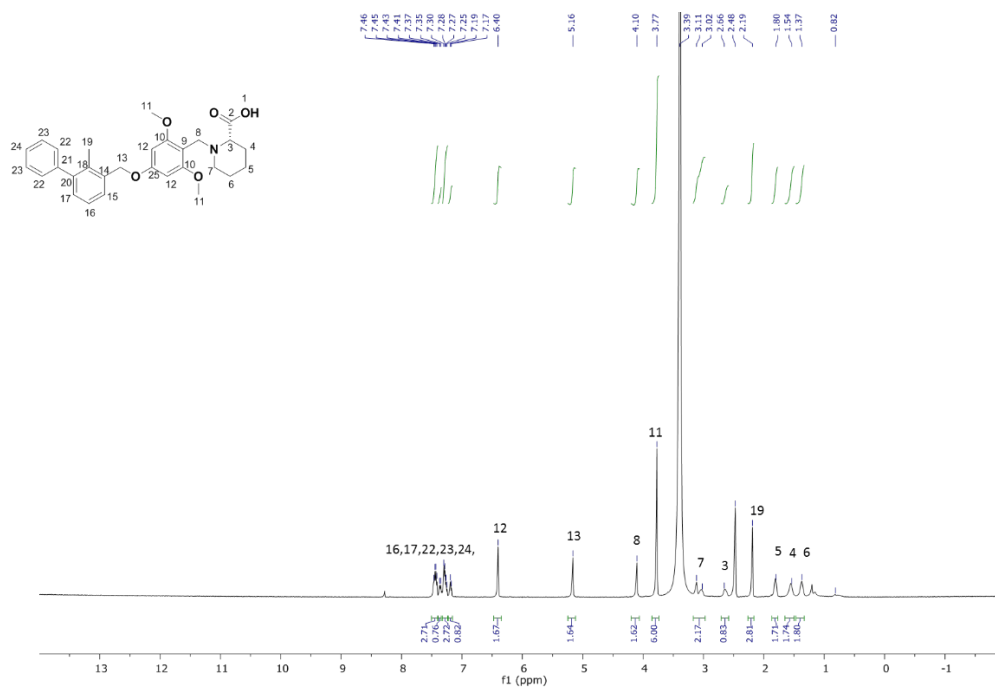

**Figure S3.**  $^1\text{H}$  NMR spectrum of **8** (400 MHz,  $\text{DMSO-}d_6$ )

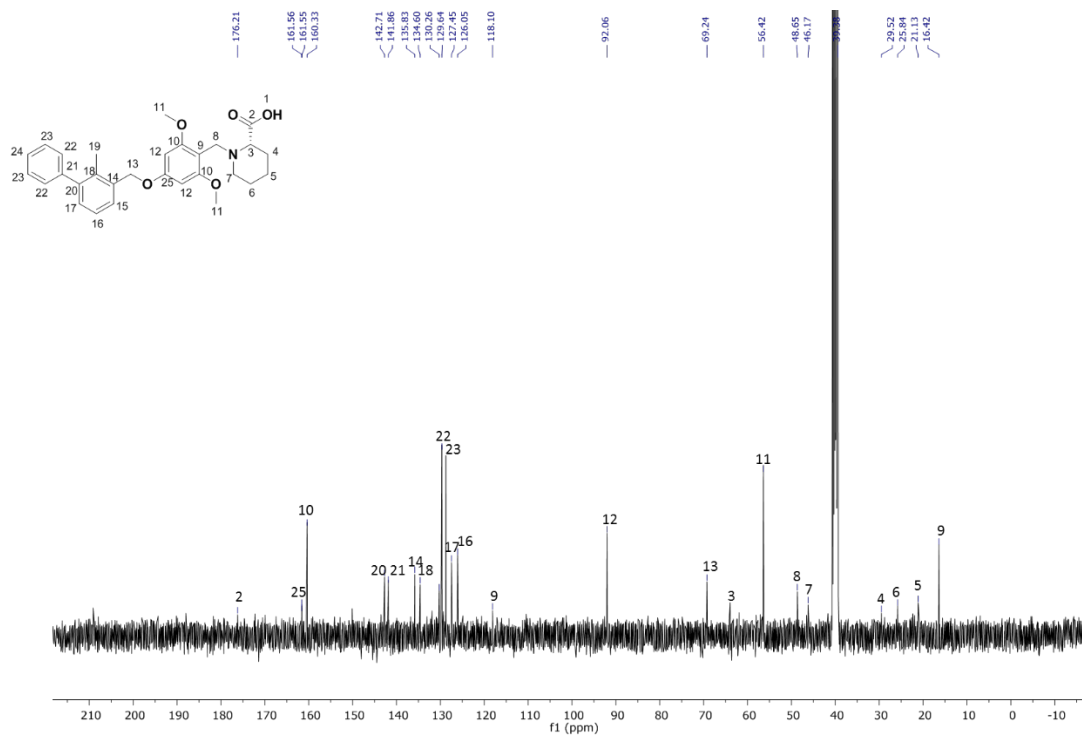

**Figure S4.**  $^{13}\text{C}$  NMR spectrum of **8** (400 MHz,  $\text{DMSO-}d_6$ )

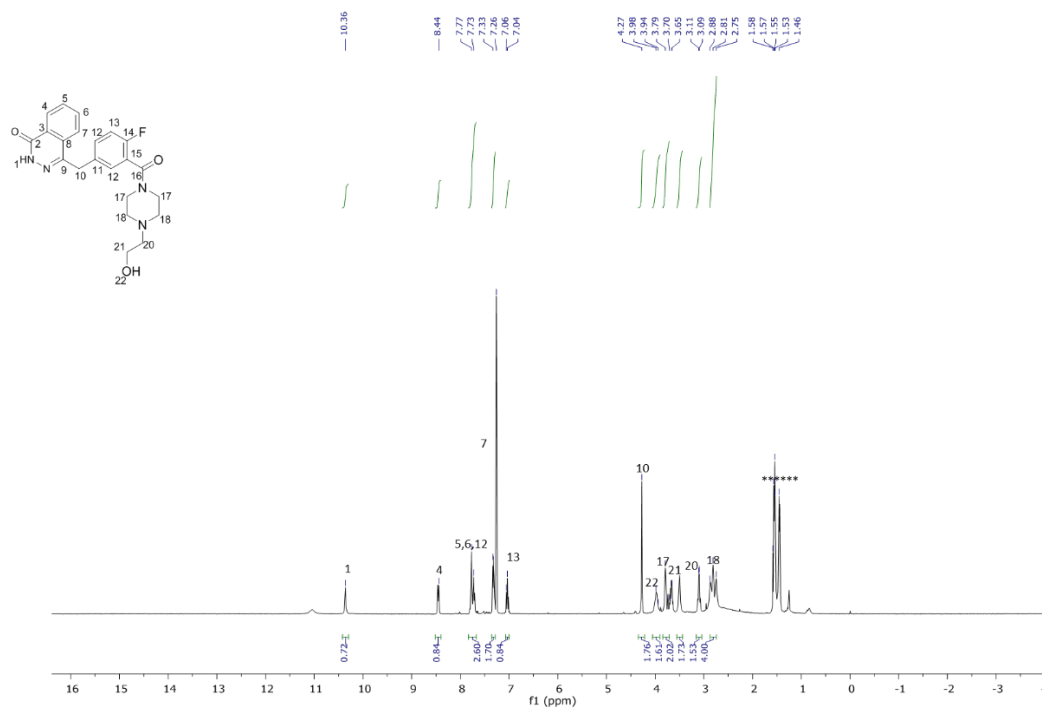

**Figure S5.** <sup>1</sup>H NMR spectrum of **11** (400 MHz, CDCl<sub>3</sub>)

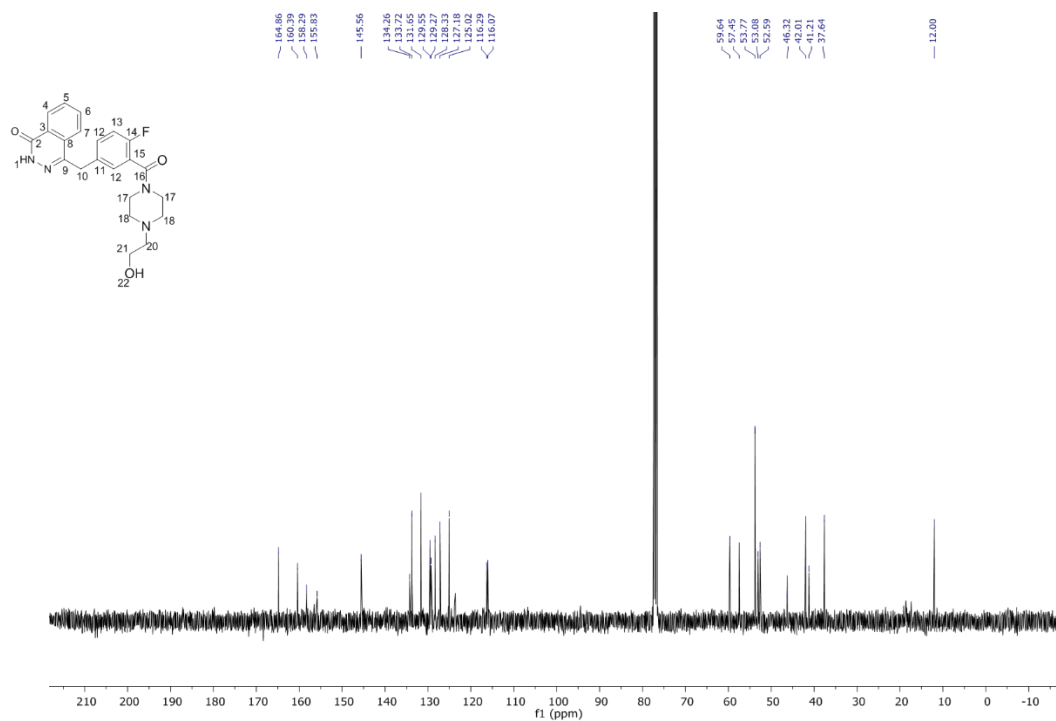

**Figure S6.** <sup>13</sup>C NMR spectrum of **11** (400 MHz, CDCl<sub>3</sub>)

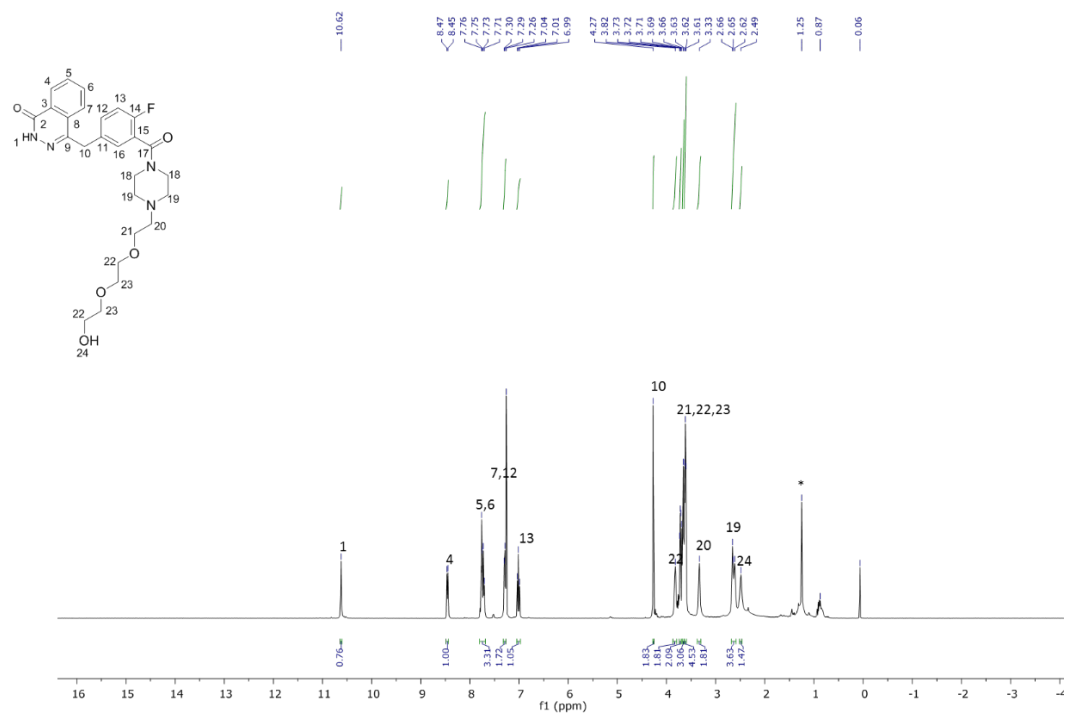

**Figure S7. <sup>1</sup>H NMR spectrum of 13 (400 MHz, CDCl<sub>3</sub>)**

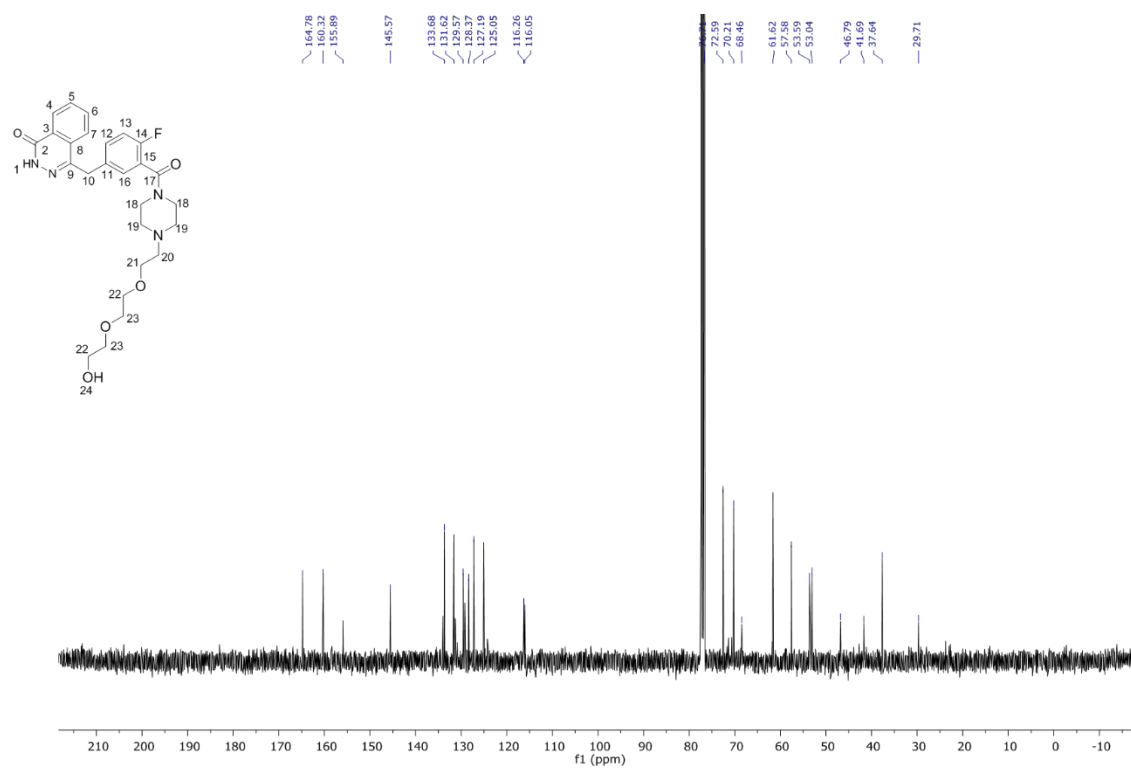

**Figure S8. <sup>13</sup>C NMR spectrum of 13 (400 MHz, CDCl<sub>3</sub>)**

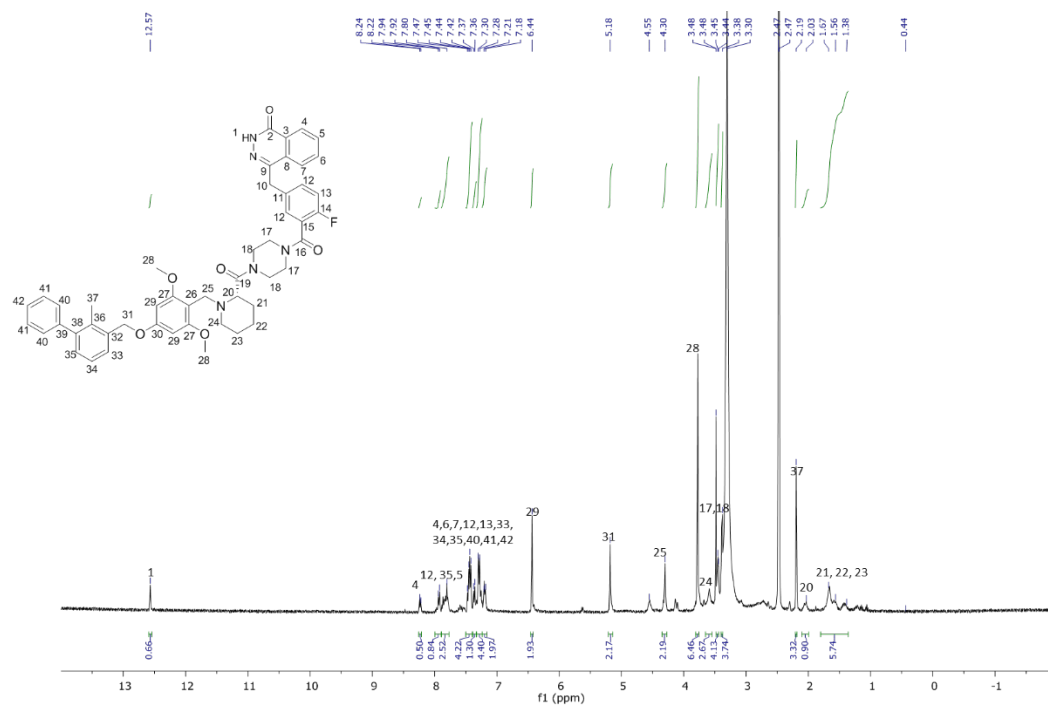

Figure S9.  $^1\text{H}$  NMR spectrum of 1 (400 MHz,  $\text{DMSO}-d_6$ )

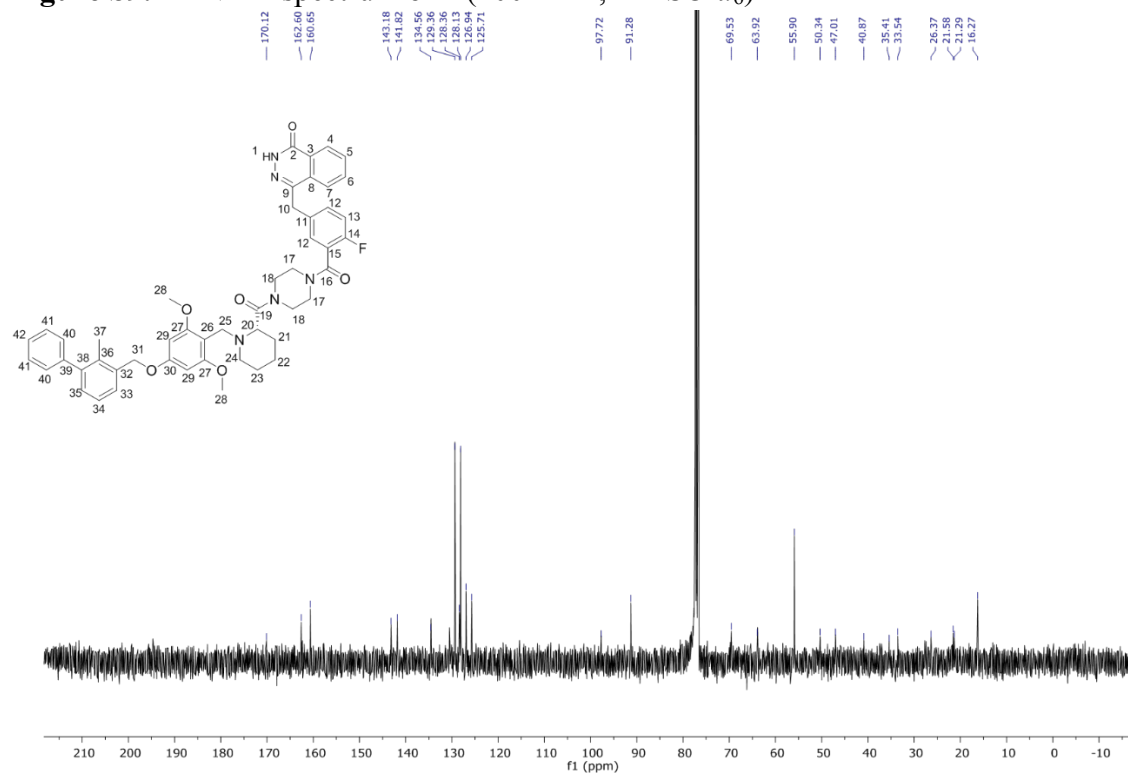

Figure S10.  $^{13}\text{C}$  NMR spectrum of 1 (400 MHz,  $\text{CDCl}_3$ )



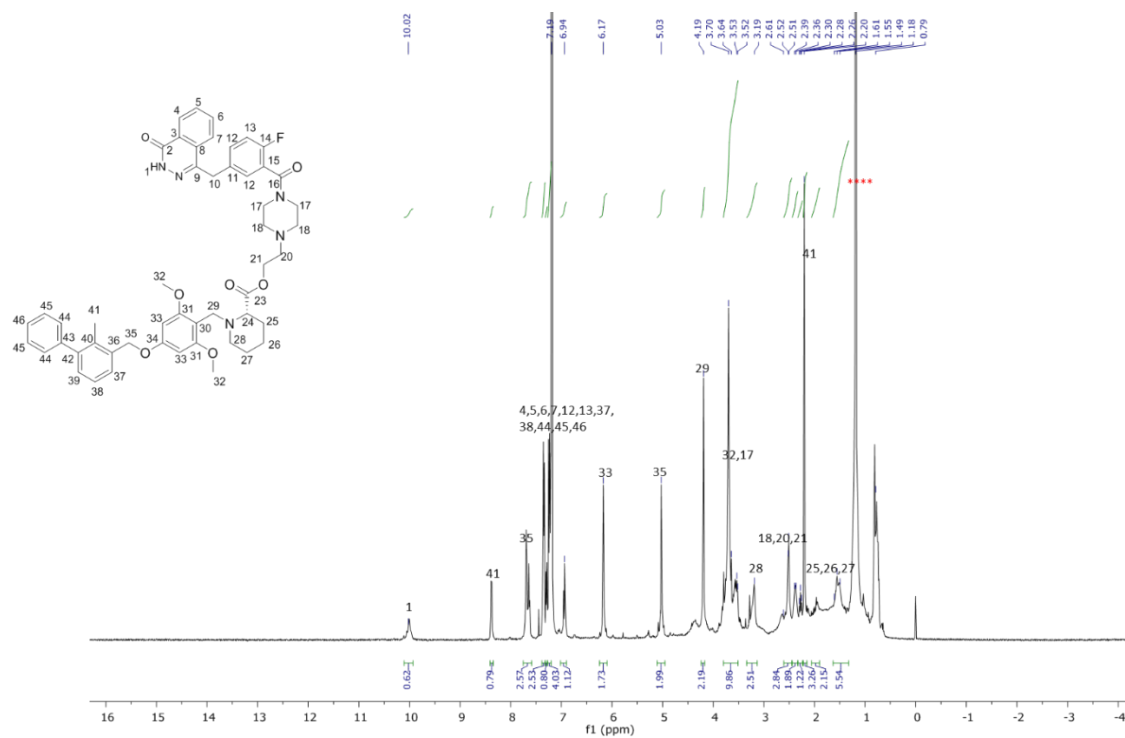

**Figure S11.**  $^1\text{H}$  NMR spectrum of **2** (400 MHz,  $\text{CDCl}_3$ )

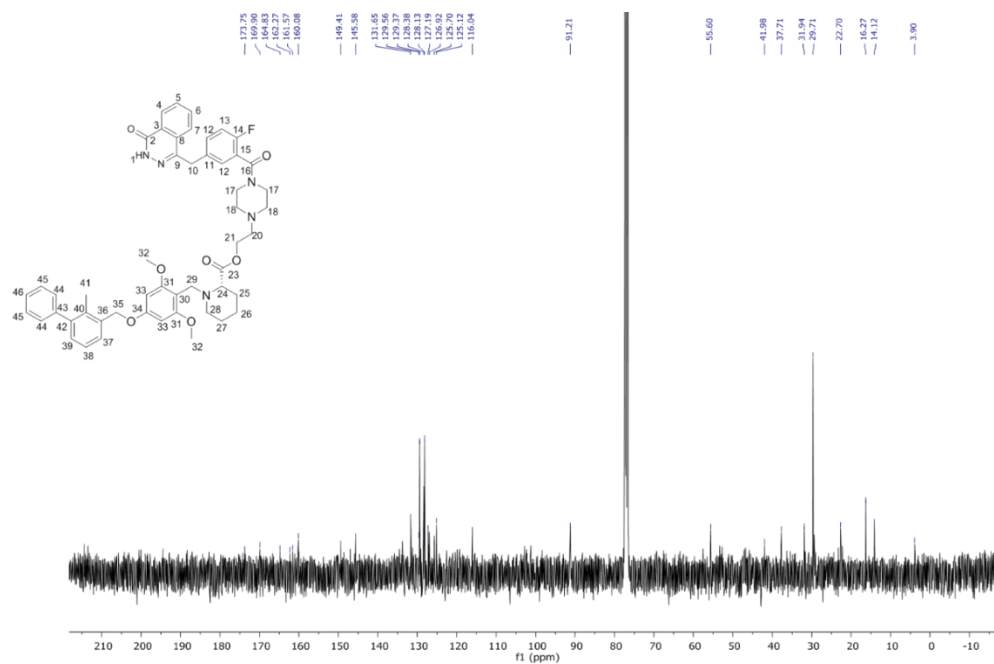

**Figure S12.**  $^{13}\text{C}$  NMR spectrum of **2** (400 MHz,  $\text{CDCl}_3$ )

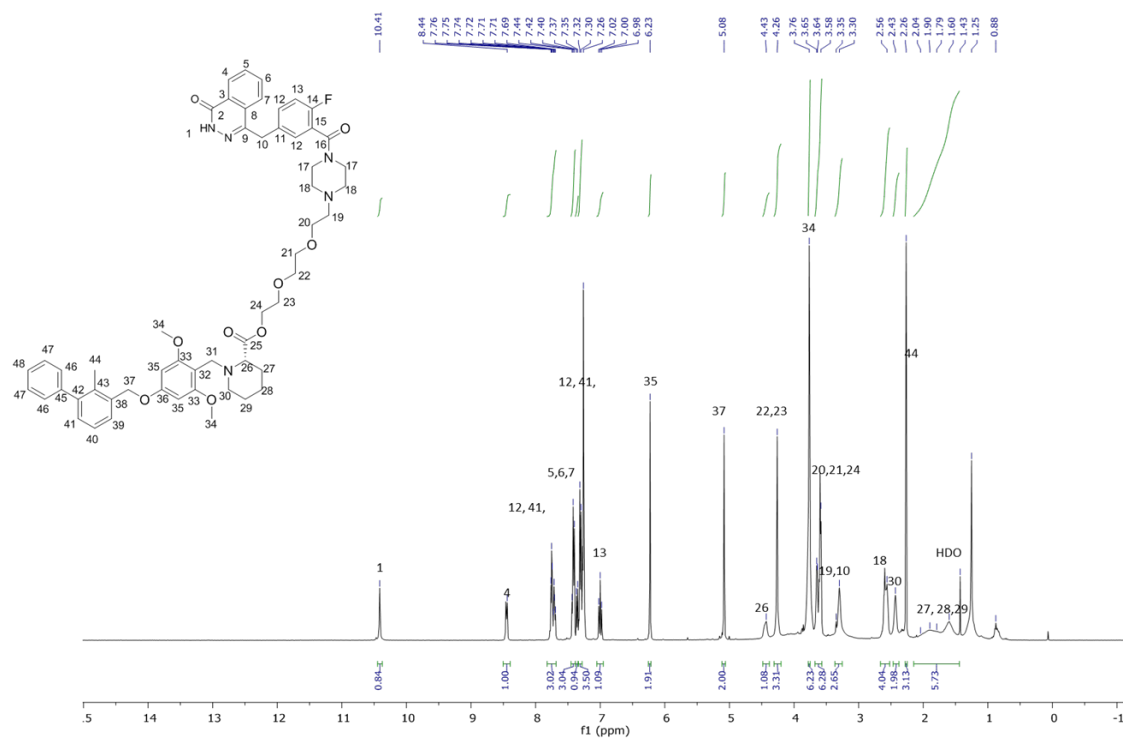

**Figure S13. <sup>1</sup>H NMR spectrum of 3 (400 MHz, CDCl<sub>3</sub>)**

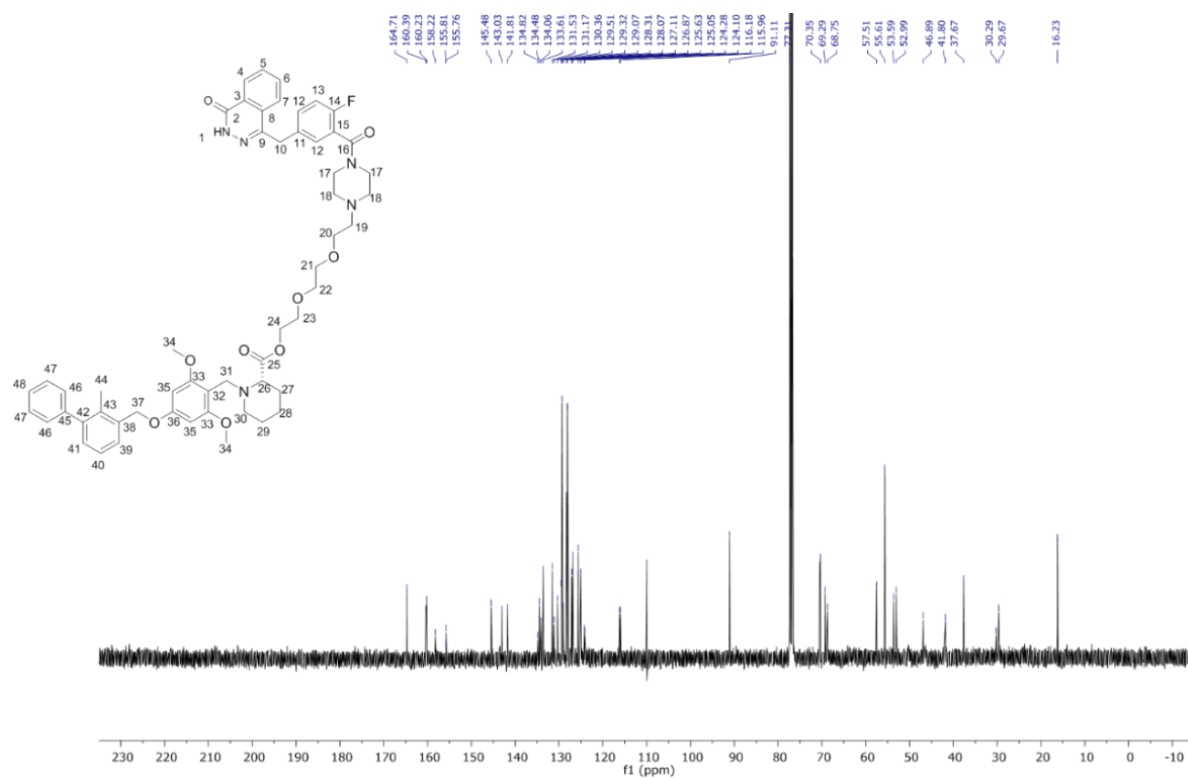

**Figure S14. <sup>13</sup>C NMR spectrum of 3 (400 MHz, CDCl<sub>3</sub>)**

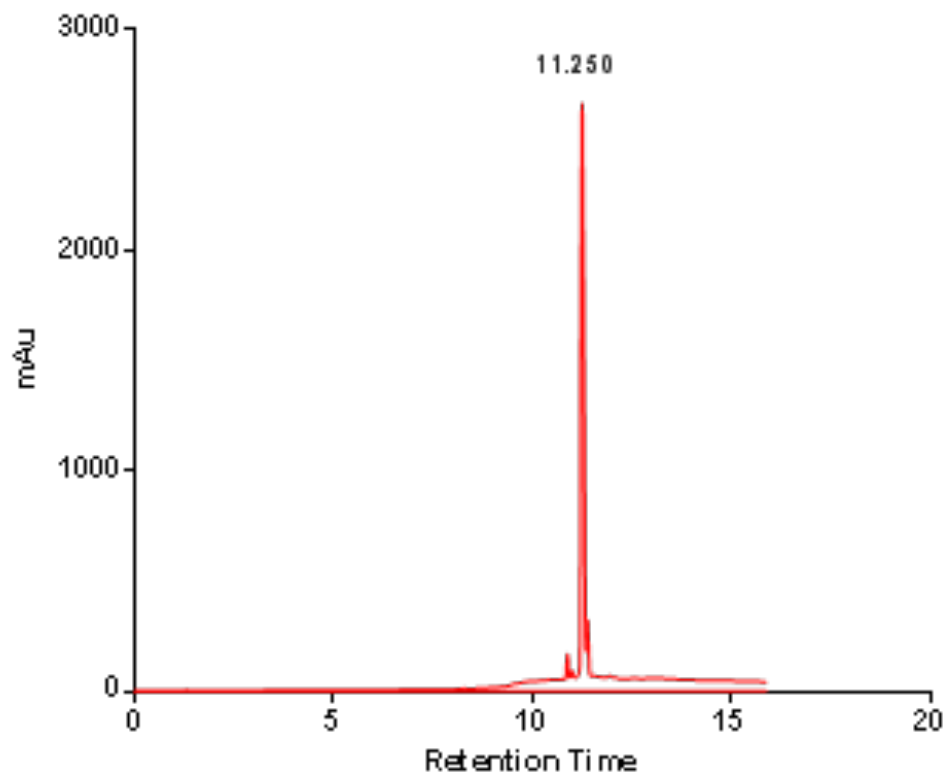

**Figure S15:** HPLC Chromatogram of Compound 1; RT: 11.250 min, 99.98% Purity

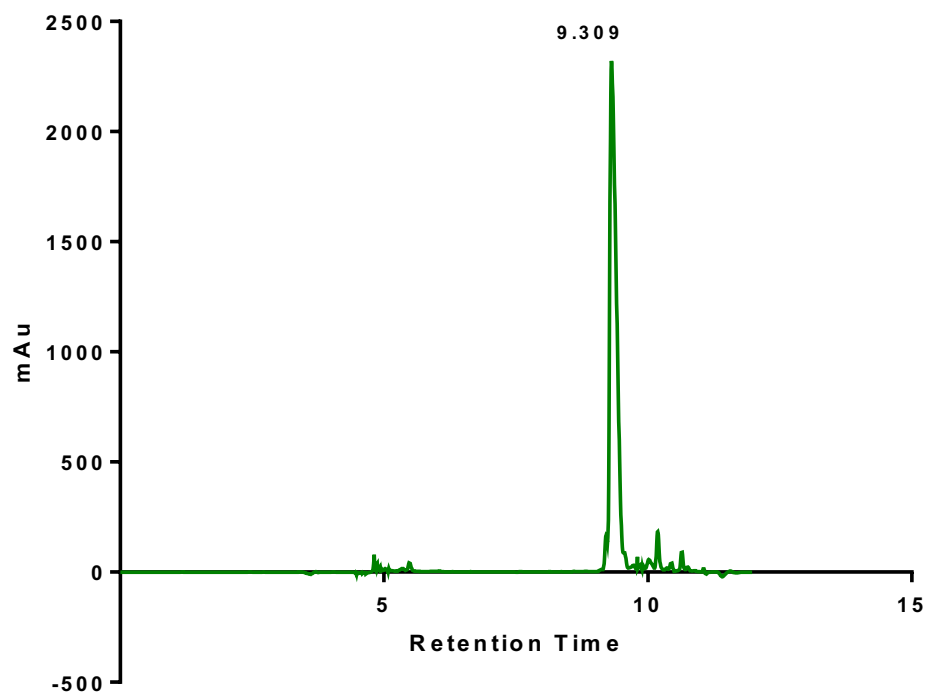

**Figure S16:** HPLC Chromatogram of Compound 2; RT: 9.308 min, 95.06% Purity

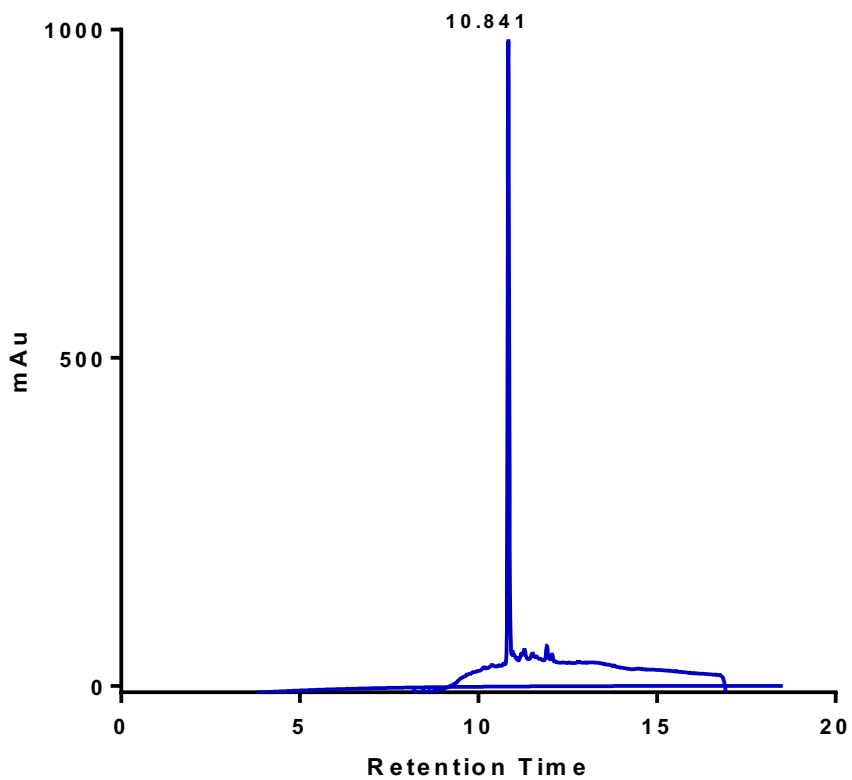

**Figure S17:** HPLC Chromatogram of Compound 3; RT: 10.841min, 99.10%

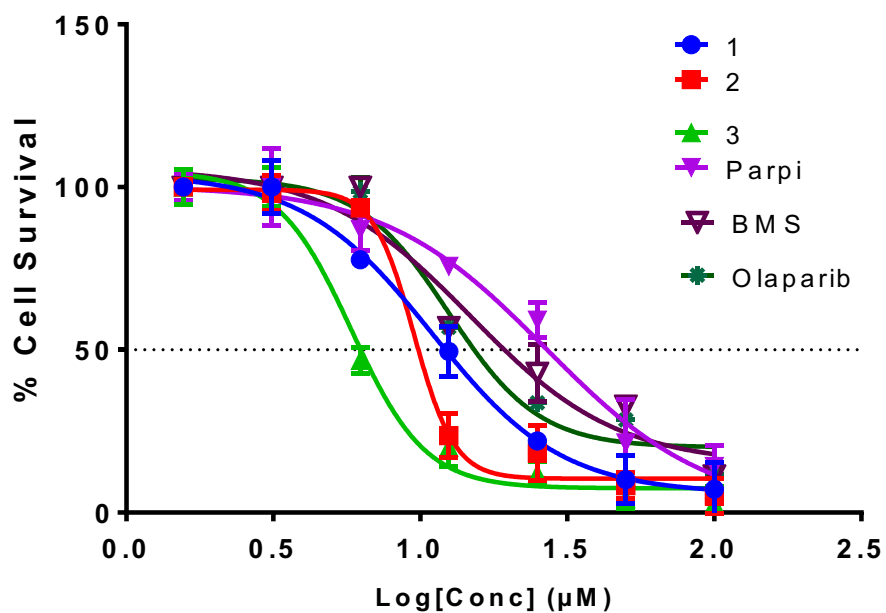

Figure S18: Dose-response curves of MDA-MB-231 cells in response to compounds

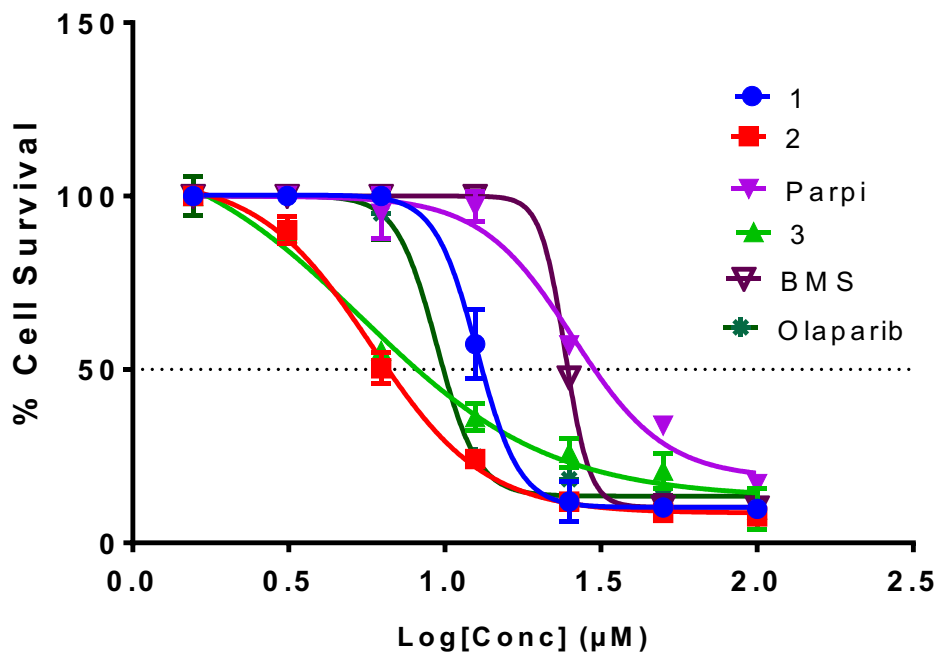

Figure S19: Dose-response curves of A2780 cells in response to compounds

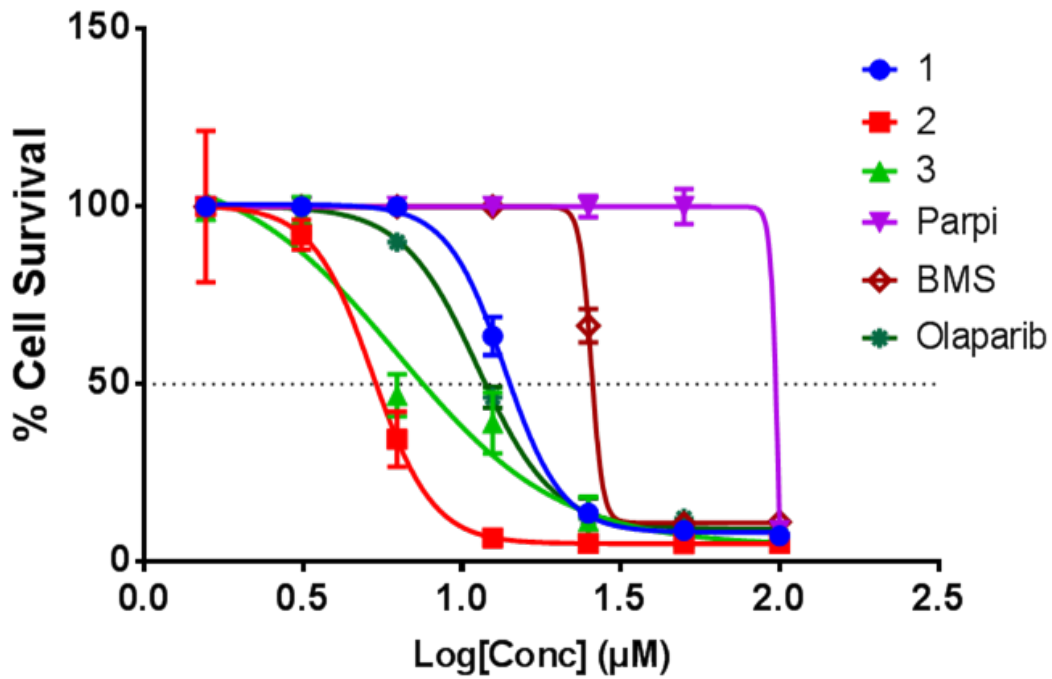

Figure S20: Dose-response curves of OVCAR8 cells in response to compounds

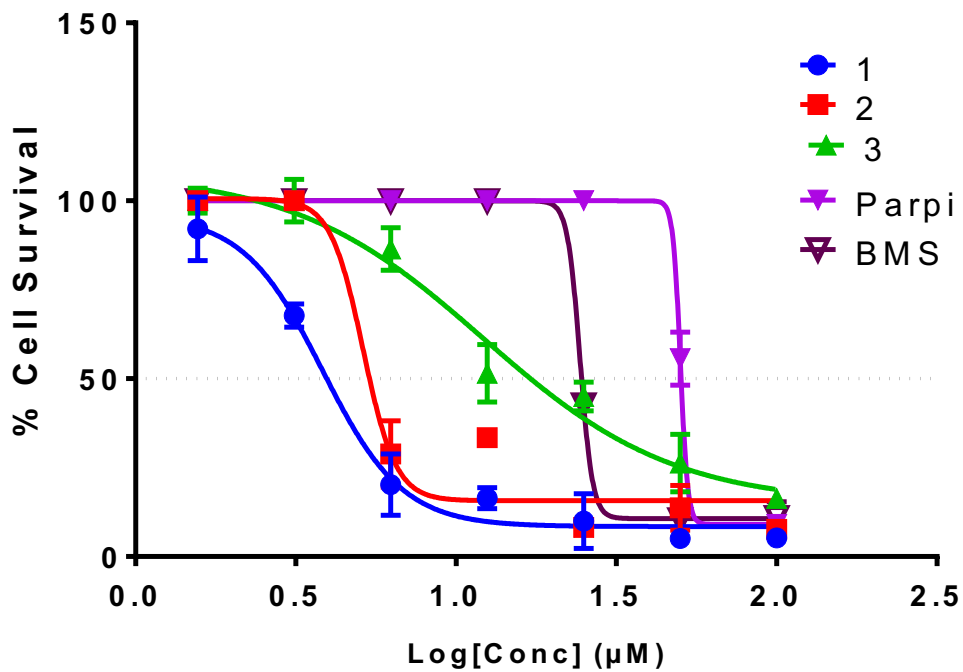

Figure S21: Dose-response curves of SKOV3 cells in response to compounds

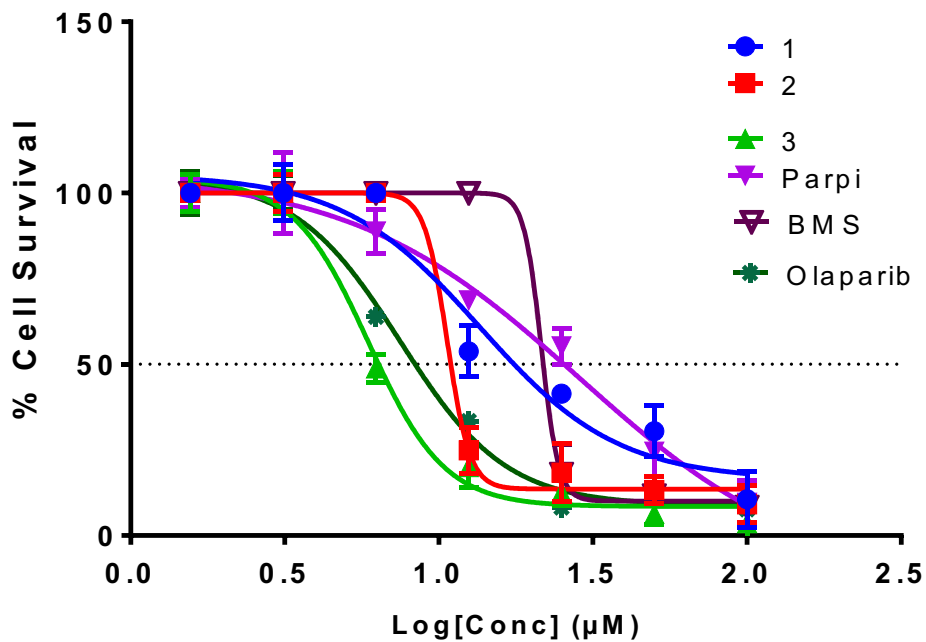

Figure S22: Dose-response curves of H460 cells in response to compounds

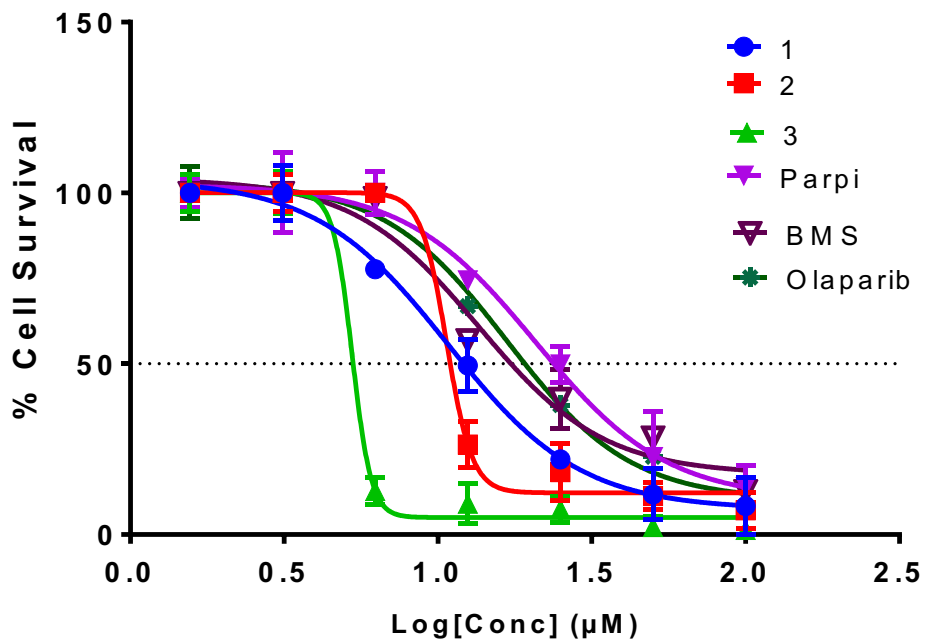

Figure S23: Dose-response curves of HCC1937 cells in response to compounds

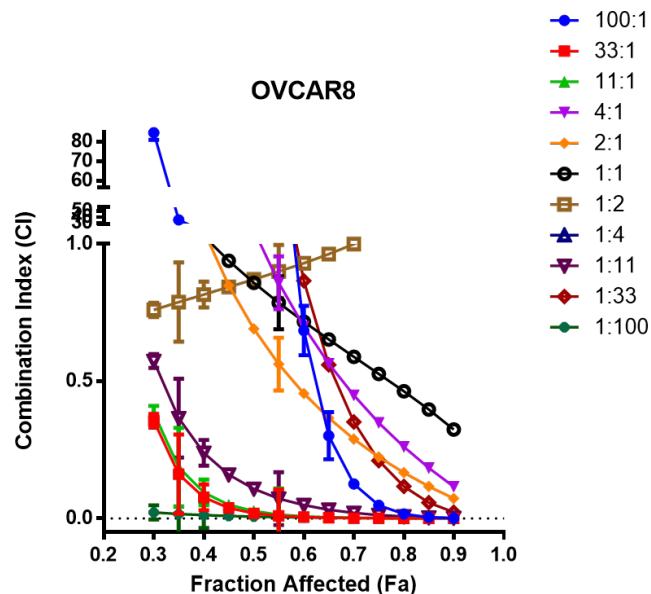

**Figure S24:** Combination Index values for olaparib-BMS001 combinations presented as a function of fraction affected (Fa) for OVCAR8 cells. Fa= 0.9 indicates 90% cell death. Each data point is presented as mean  $\pm$  SD obtained from three independent biological experiments. Ratios of combination of Olaparib to BMS001 are indicated (legend).

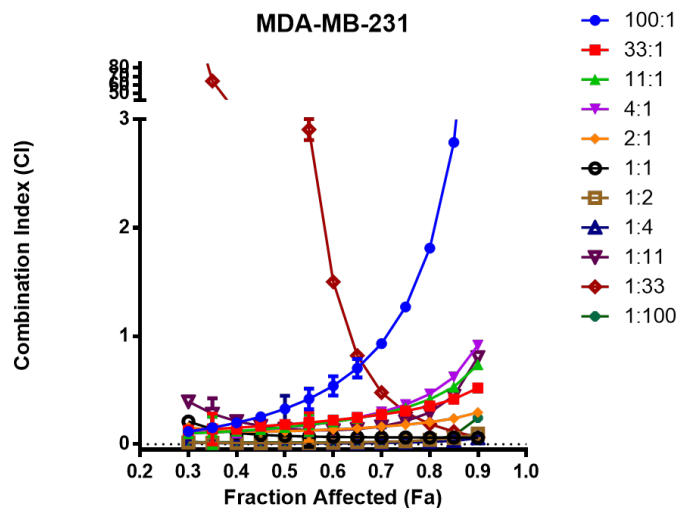

**Figure S25:** The combination Index values for olaparib-BMS001 combinations presented as a function of fraction affected (Fa) for MDA-MB-231 cells. Fa= 0.9 indicates 90% cell death. Each data point is presented as mean  $\pm$  SD obtained from three independent biological experiments. Ratios of combination of Olaparib to BMS001 are indicated (legend).



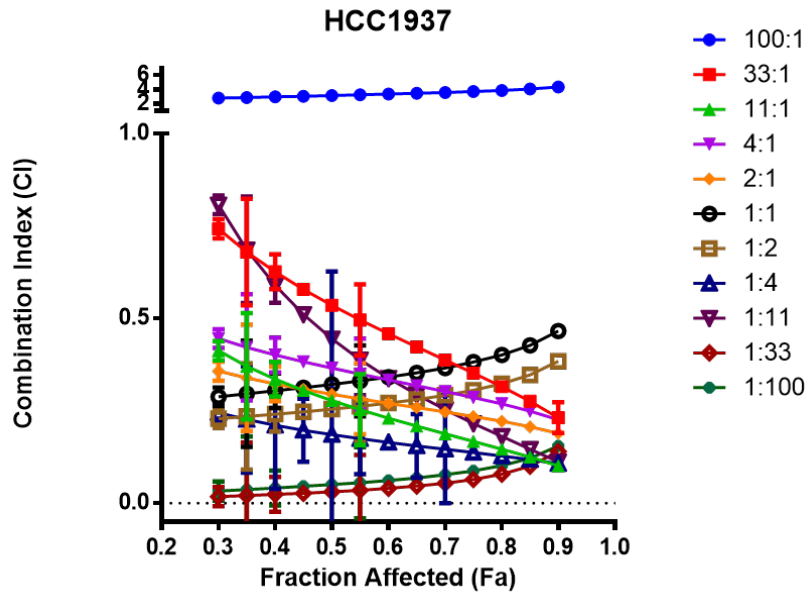

**Figure S26:** The combination Index values for olaparib-BMS001 combinations presented as a function of fraction affected (Fa) for HCC1937 cells. Fa= 0.9 indicates 90% cell death. Each data point is presented as mean  $\pm$  SD obtained from three independent biological experiments. Ratios of combination of Olaparib to BMS001 are indicated (legend).

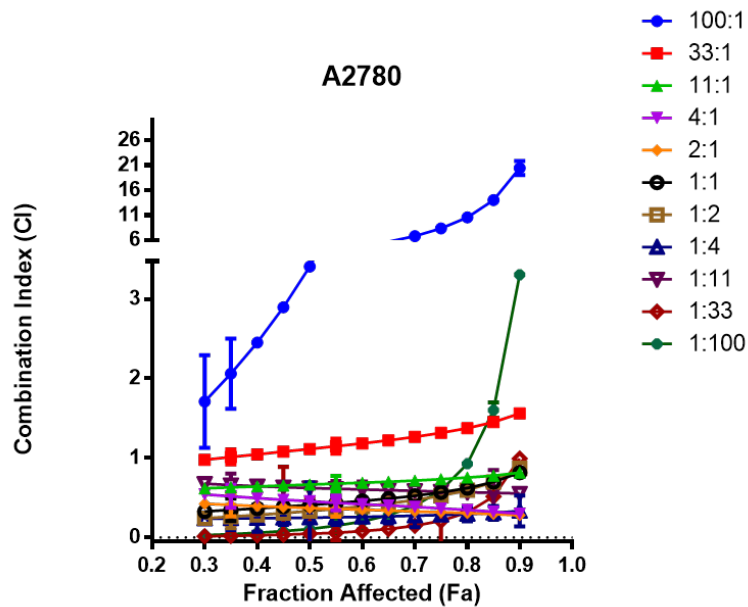

**Figure S27:** The combination Index values for olaparib-BMS001 combinations presented as a function of fraction affected (Fa) for A2780 cells. Fa= 0.9 indicates 90% cell death. Each data point is presented as mean  $\pm$  SD obtained from three independent biological experiments. Ratios of combination of Olaparib to BMS001 are indicated (legend).

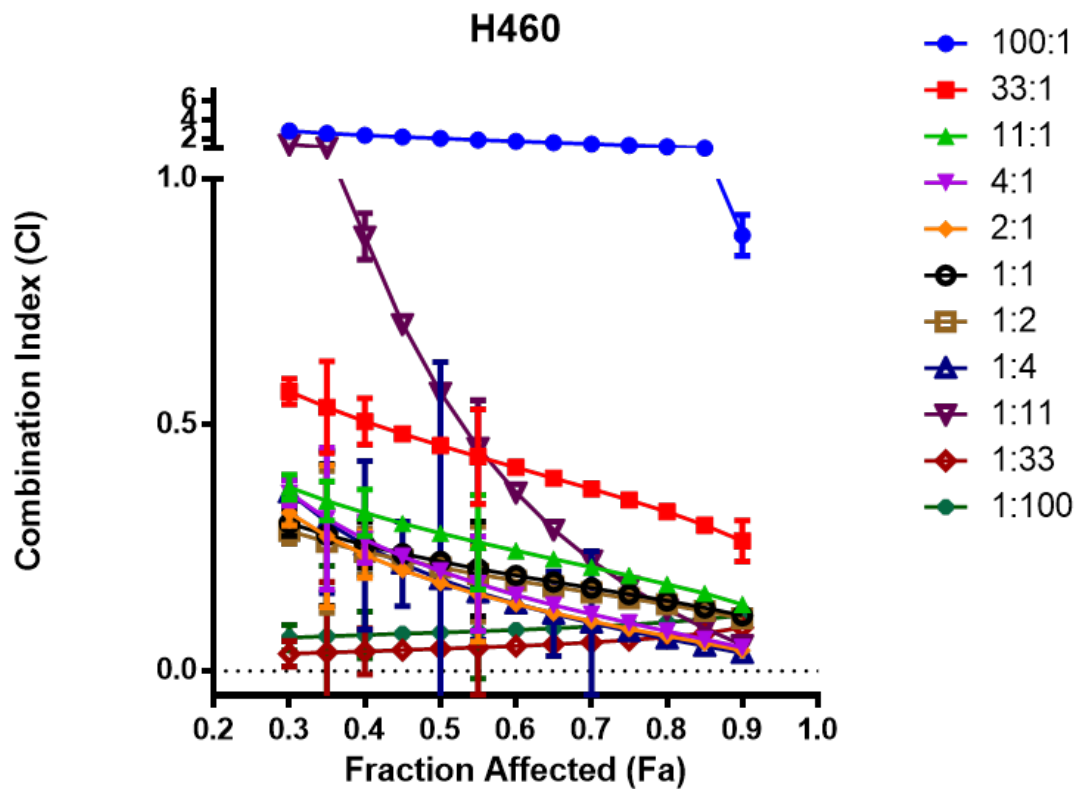

**Figure S28:** The combination Index values for olaparib-BMS001 combinations presented as a function of fraction affected (Fa) for H460 cells. Fa= 0.9 indicates 90% cell death. Each data point is presented as mean  $\pm$  SD obtained from three independent biological experiments. Ratios of combination of Olaparib to BMS001 are indicated (legend).

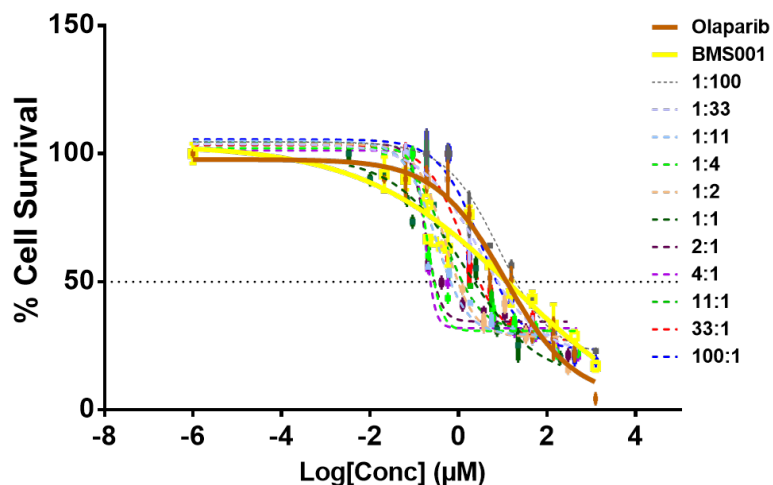

**Figure S29:** Dose-Response curve of OVCAR8 cell lines for Olaparib or BMS given as a monotherapy, or in combination. For both monotherapy and combination, cells were treated with three-fold serial dilution of Olaparib/BMS (maximum concentration was 1.25mM, minimum concentration = 12.5µM, same multiples were used for 100:1, 33:1, 11:1 and the reverse, eg. , 100:1 = 1.25mM Ola + 12.5µM BMS001). For 1:1 - the Olaparib: BMS001 concentration were set at 100µM: 100µM, the same multiples were used for 1:2, 2:1, 1:4, 4:1). Each data point is presented as mean  $\pm$ SD obtained from three independent biological experiments.

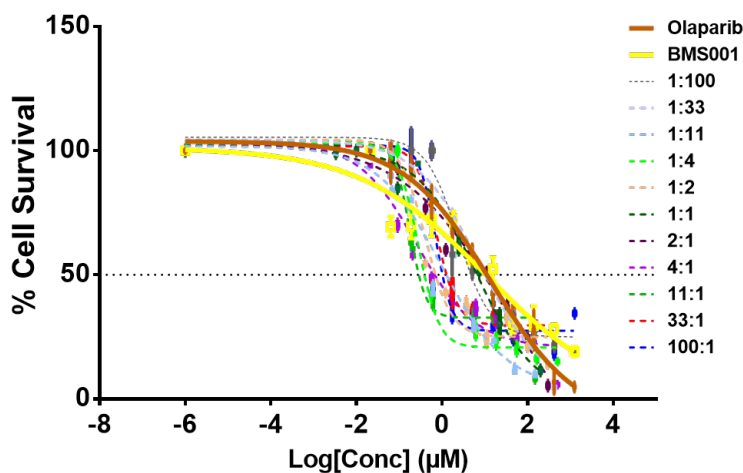

**Figure S30:** Dose-Response curve of MDA-MB-231 cell lines for Olaparib or BMS given as a monotherapy, or in combination. For both monotherapy and combination, cells were treated with three-fold serial dilution of Olaparib/BMS (maximum concentration was 1.25mM, minimum concentration = 12.5µM, same multiples were used for 100:1, 33:1, 11:1 and the reverse, e.g. 100:1 = 1.25mM Ola + 12.5µM BMS001). For 1:1 - the Olaparib: BMS001 concentration were set at 100µM: 100µM, the same multiples were used for 1:2, 2:1, 1:4, 4:1). Each data point is presented as mean  $\pm$ SD obtained from three independent biological experiments.

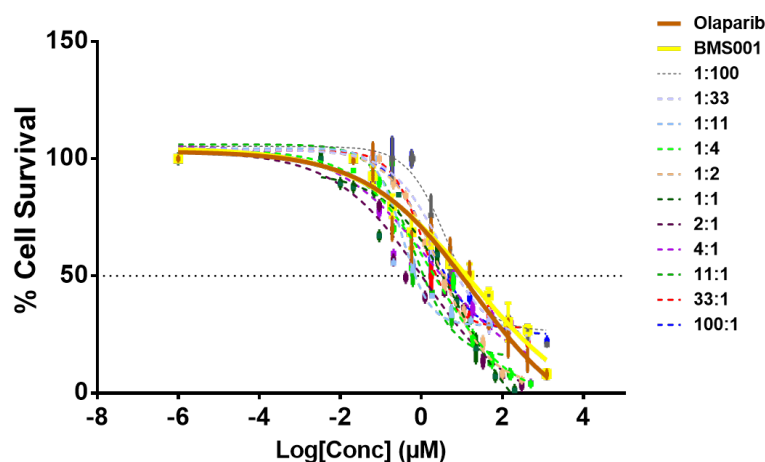

**Figure S31:** Dose-Response curve of HCC1937 cell lines for Olaparib or BMS given as a monotherapy, or in combination. For both monotherapy and combination, cells were treated with three-fold serial dilution of Olaparib/BMS (maximum concentration was 1.25mM, minimum concentration = 12.5 $\mu$ M, same multiples were used for 100:1, 33:1, 11:1 and the reverse, eg. , 100:1 = 1.25mM Ola + 12.5 $\mu$ M BMS001 stock).. For 1:1 - the Olaparib: BMS001 concentration were set at 100 $\mu$ M: 100 $\mu$ M, the same multiples were used for 1:2, 2:1, 1:4, 4:1). Each data point is presented as mean  $\pm$ SD obtained from three independent biological experiments.

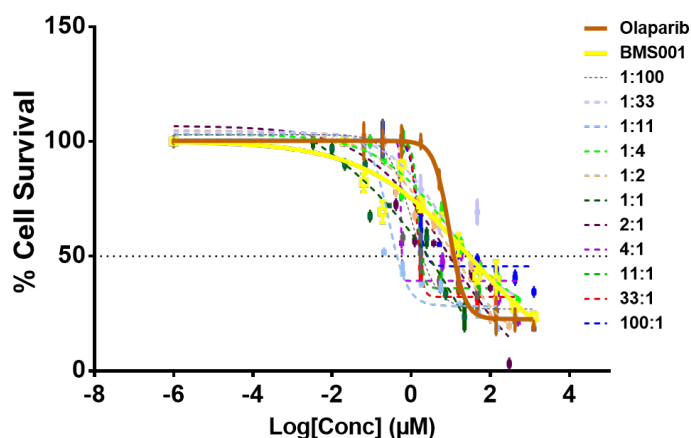

**Figure S32:** Dose-Response curve of HCC1937 cell lines for Olaparib or BMS given as a monotherapy, or in combination. For both monotherapy and combination, cells were treated with three-fold serial dilution of Olaparib/BMS (maximum concentration was 1.25mM, minimum concentration = 12.5 $\mu$ M, same multiples were used for 100:1, 33:1, 11:1 and the reverse, eg. , 100:1 = 1.25mM Ola + 12.5 $\mu$ M BMS001).For 1:1 - the Olaparib: BMS001 concentration were set at 100 $\mu$ M: 100 $\mu$ M, the same multiples were used for 1:2, 2:1, 1:4, 4:1). Each data point is presented as mean  $\pm$ SD obtained from three independent biological experiments.

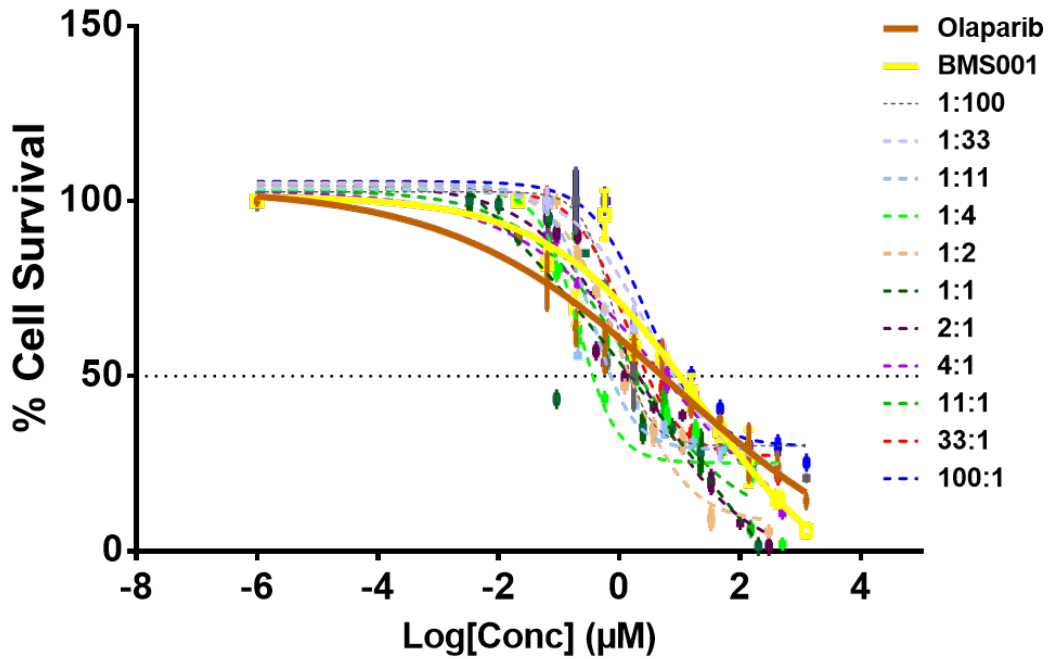

**Figure S33:** Dose-Response curve of H460 cell lines for Olaparib or BMS given as a monotherapy, or in combination. For both monotherapy and combination, cells were treated with three-fold serial dilution of Olaparib/BMS (maximum concentration was 1.25mM, minimum concentration = 12.5µM, same multiples were used for 100:1, 33:1, 11:1 and the reverse, eg. , 100:1 = 1.25mM Ola + 12.5µM BMS001).For 1:1 - the Olaparib: BMS001 concentration were set at 100µM: 100µM, the same multiples were used for 1:2, 2:1, 1:4, 4:1). Each data point is presented as mean  $\pm$ SD obtained from three independent biological experiments.

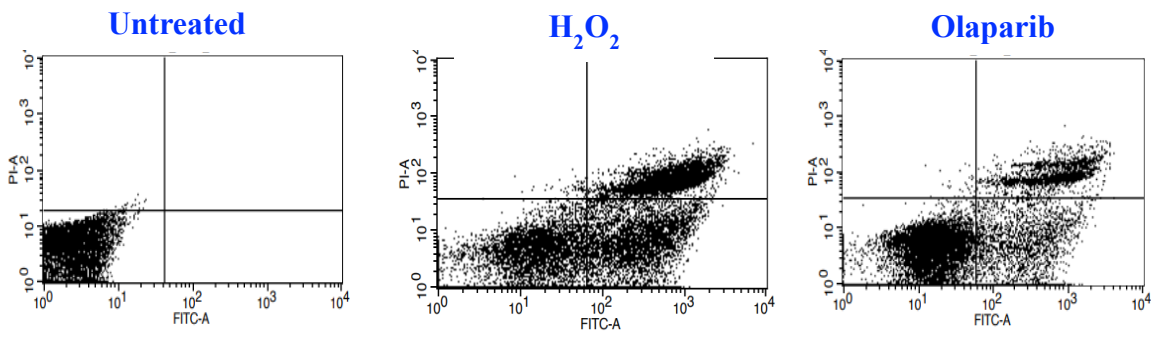

**Figure S34:** Apoptosis induced by olaparib in MDA-MB-231 cells with respective controls.

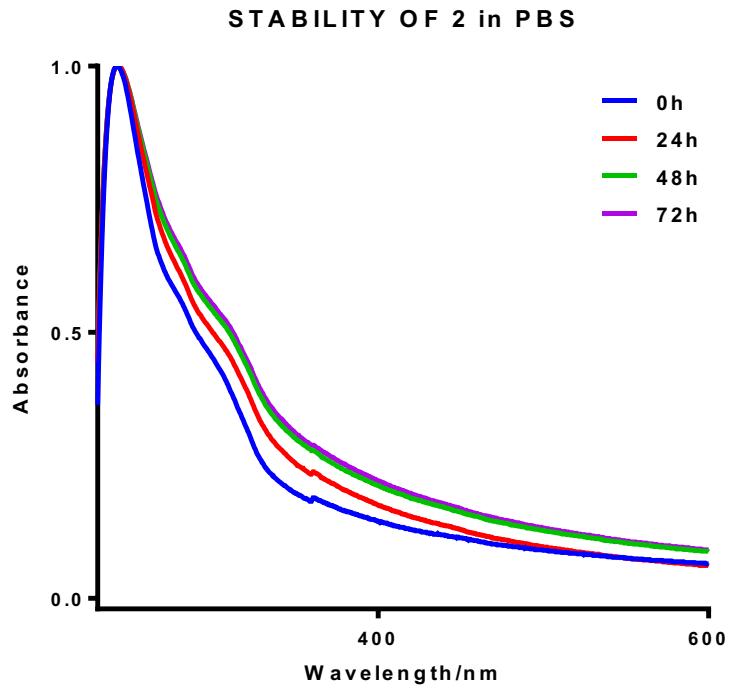

**Figure S35:** UV absorption profile of conjugate 2 in PBS

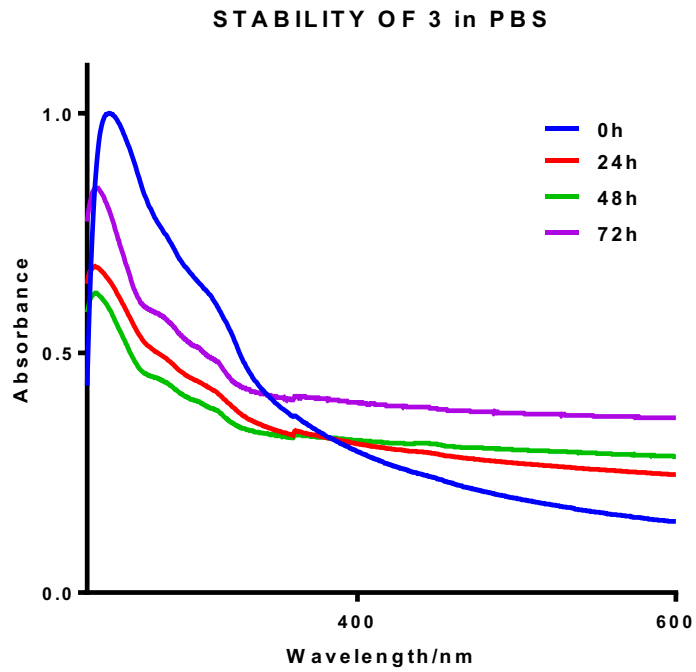

**Figure S36:** UV absorption profile of conjugate 3 in PBS

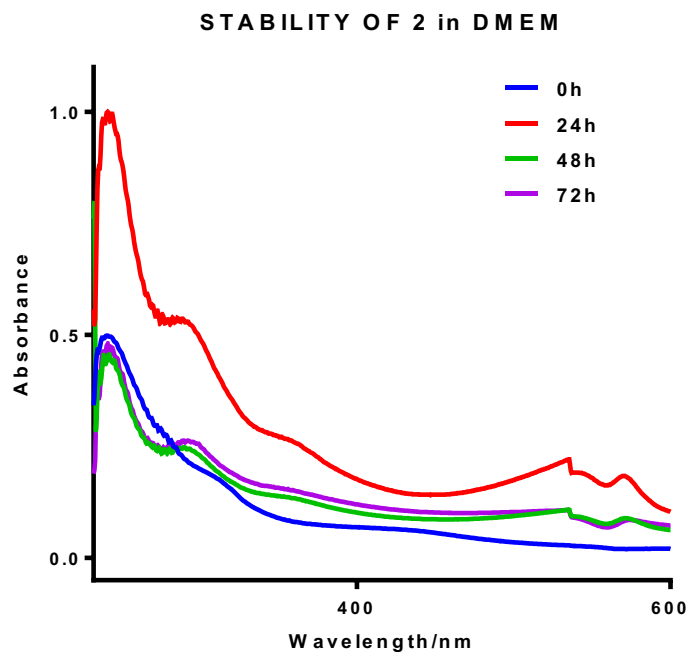

**Figure S37:** UV absorption profile of conjugate 2 in DMEM

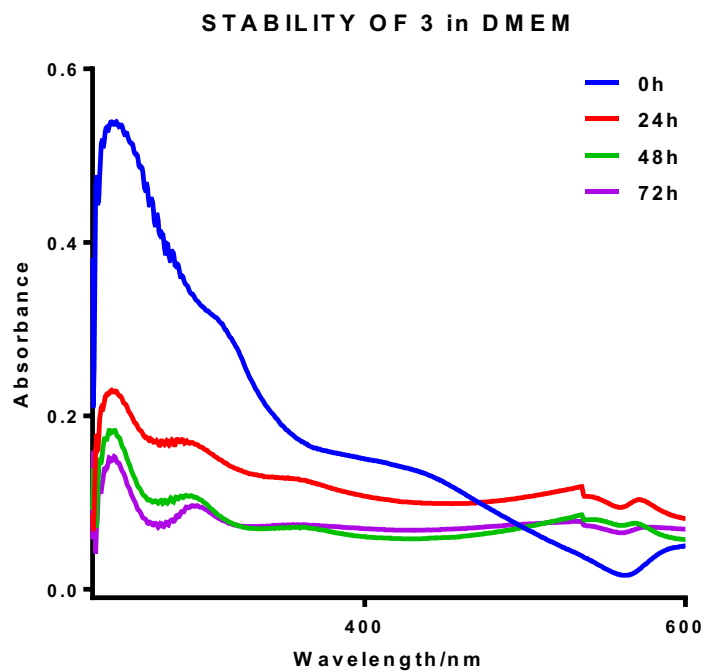

**Figure S38:** UV absorption profile of conjugate 3 in DMEM



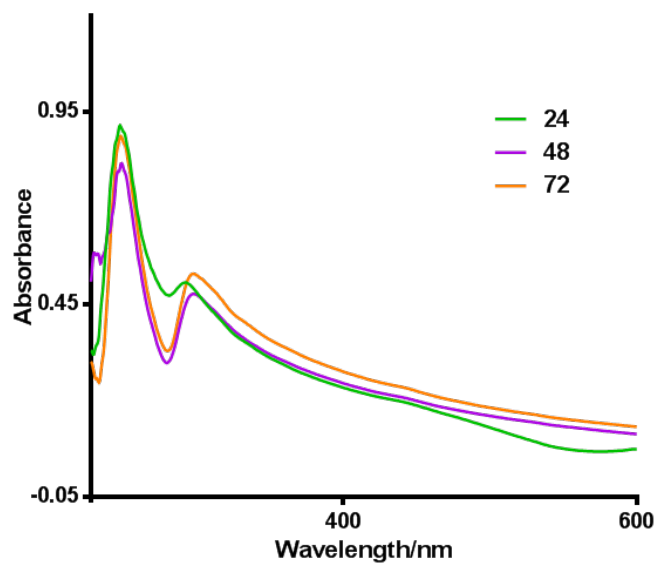

**Figure S39:** UV absorption profile of conjugate 1 in BSA after time points (in hours)

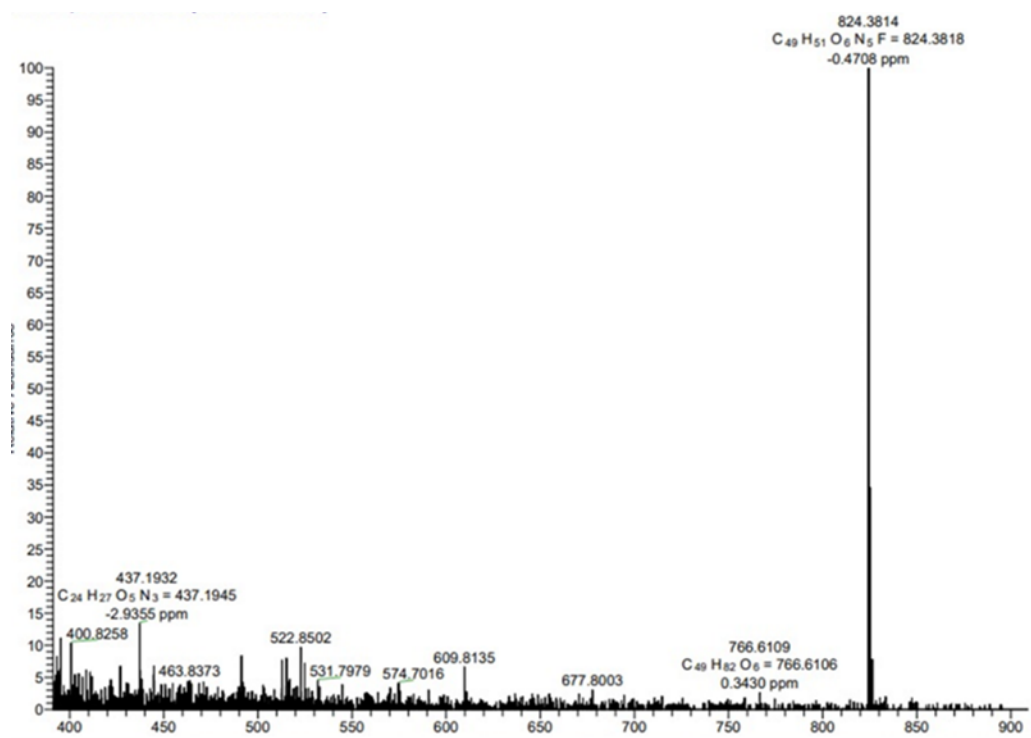

**Figure S40:** Mass spectra of an extract of Conjugate 1-BSA mix after 72 h

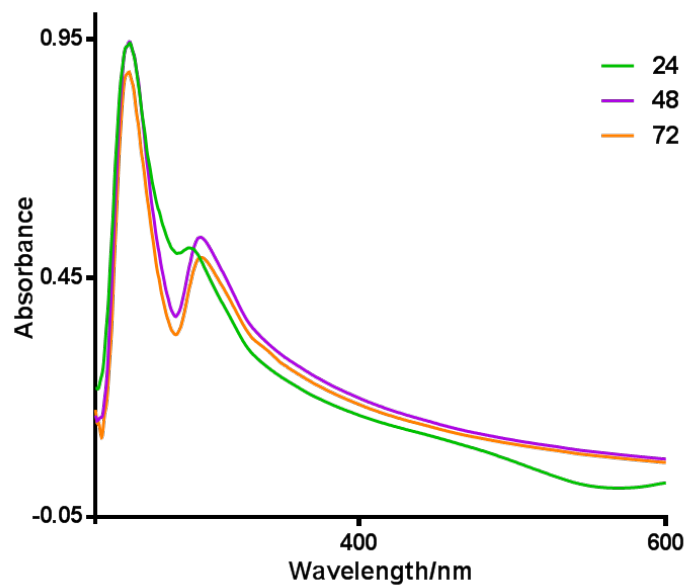

**Figure S41:** UV absorption profile of conjugate **2** in BSA after time points (in hours)

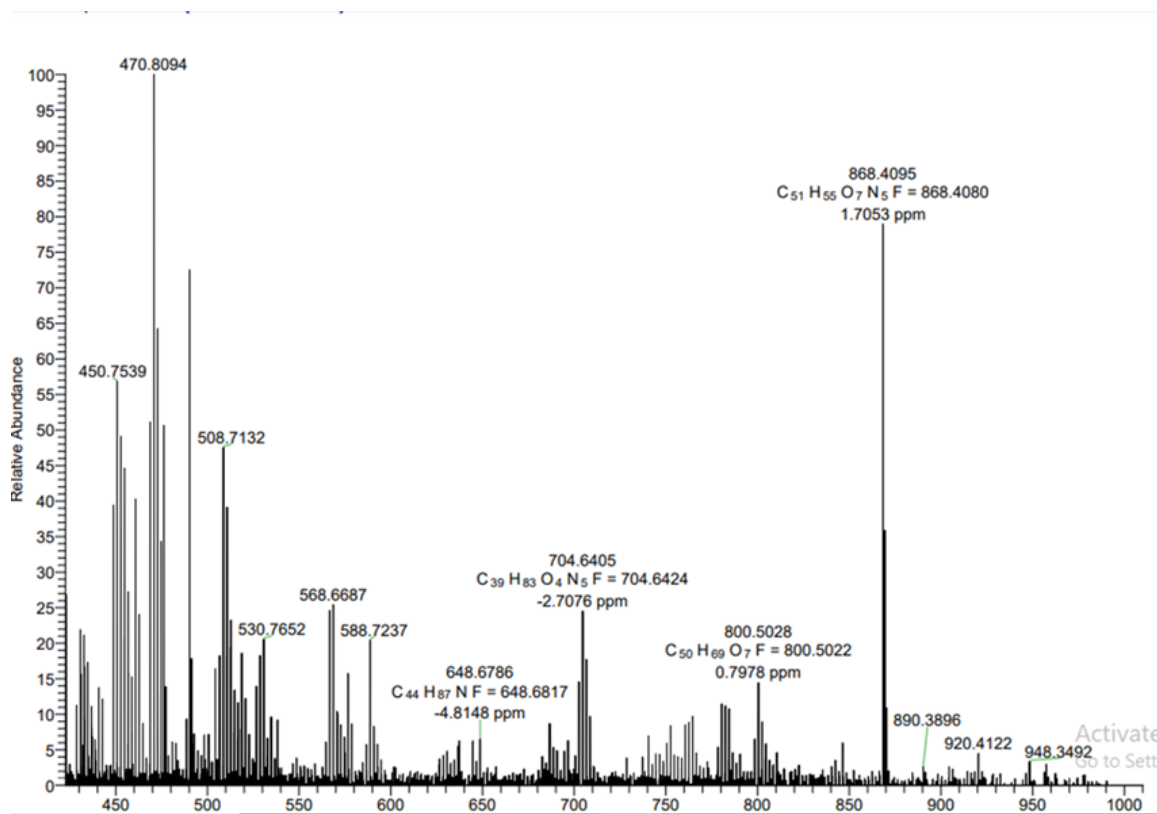

**Figure S42:** Mass spectra of an extract of Conjugate **2**-BSA mix after 72 h

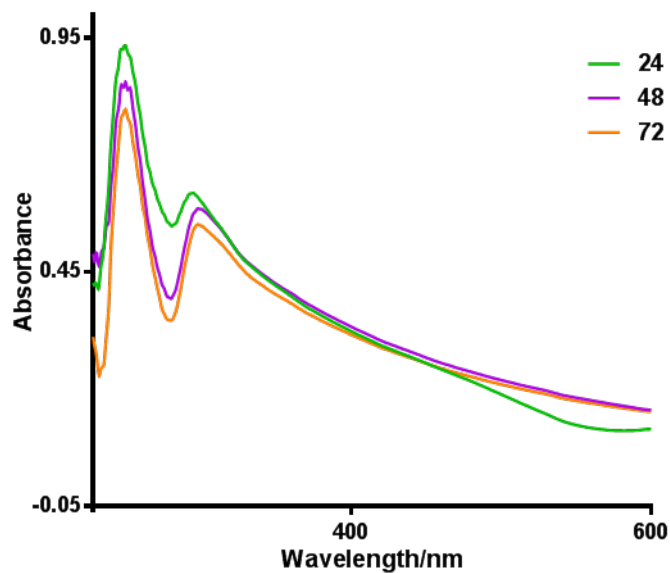

**Figure S43:** UV absorption profile of conjugate **3** in BSA after time points (in hours)

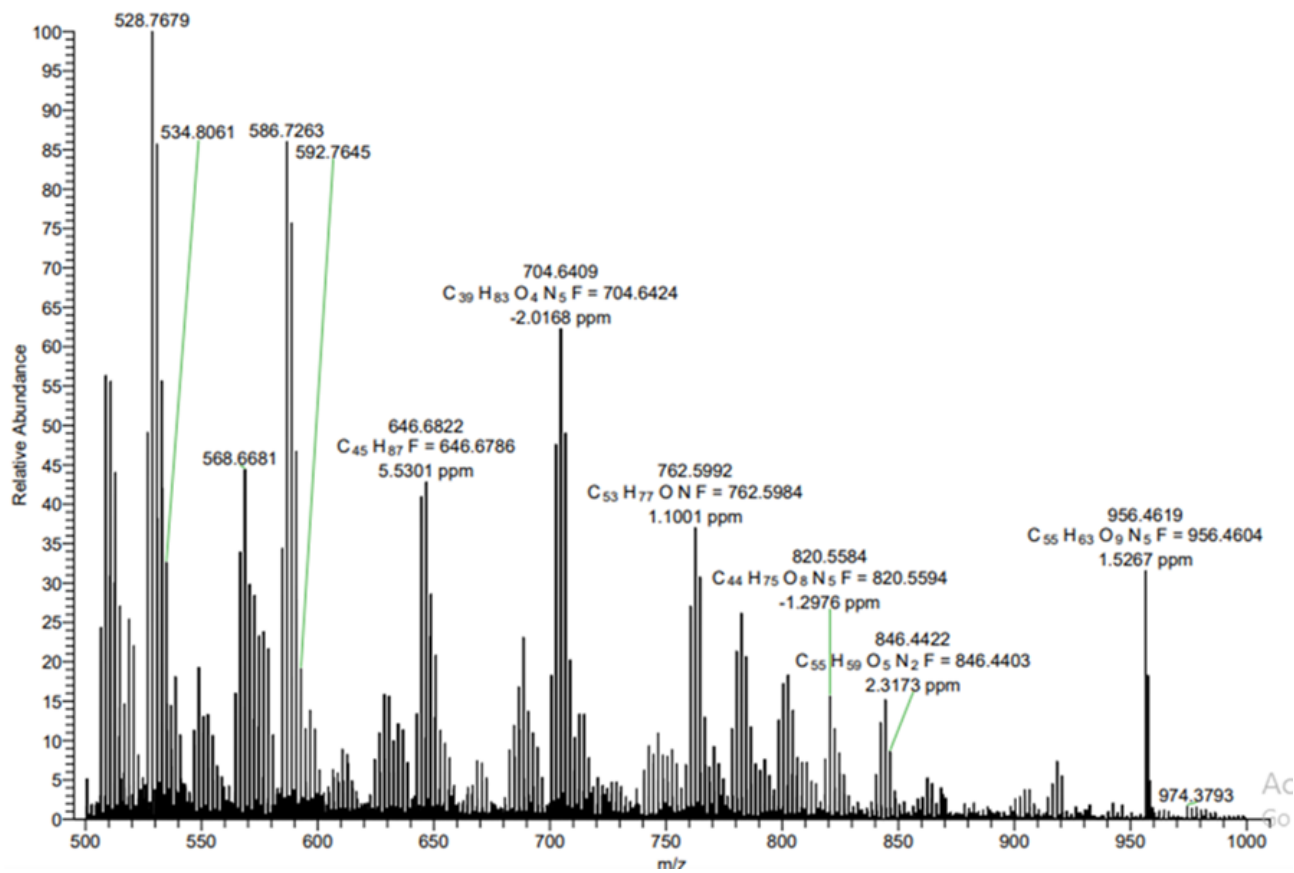

**Figure S44:** Mass spectra of an extract of Conjugate **3**-BSA mix after 72 h

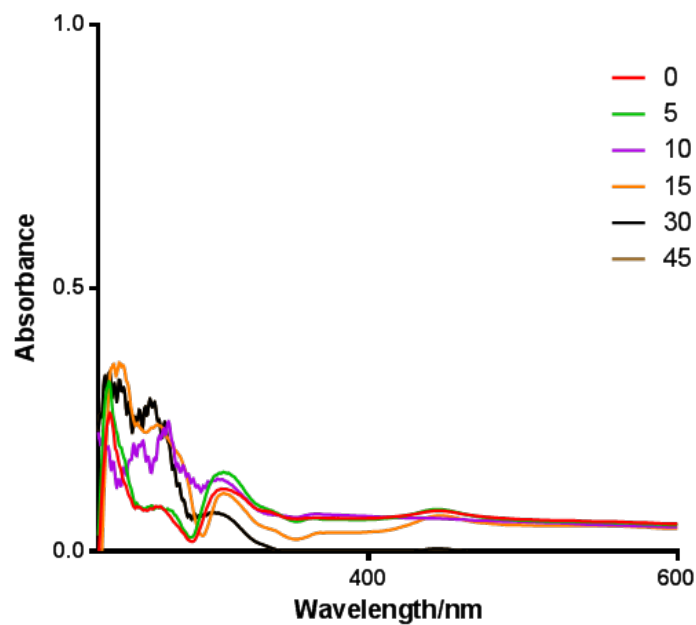

**Figure S45:** UV absorption profile of conjugate 1 incubated with liver microsomes at time points: 0, 5, 10, 15, 30, 45 minutes.

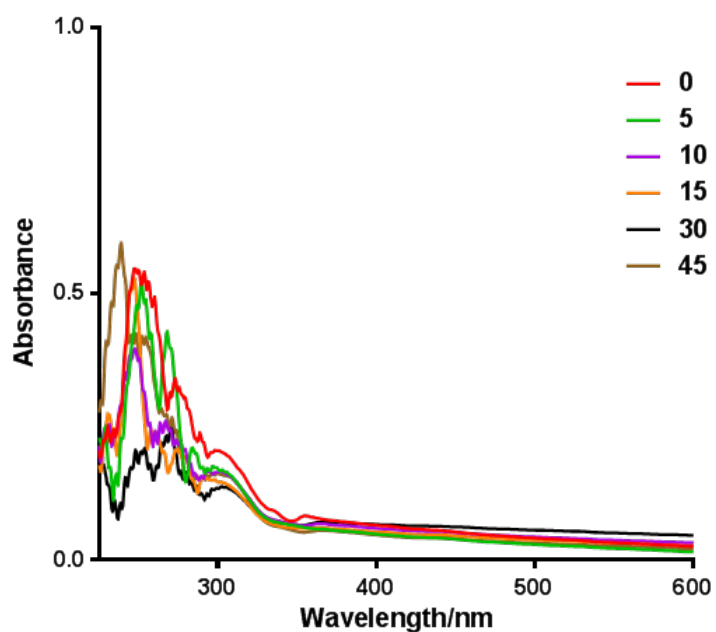

**Figure S46:** UV absorption profile of conjugate 2 incubated with liver microsomes at time points: 0, 5, 10, 15, 30, 45 minutes.

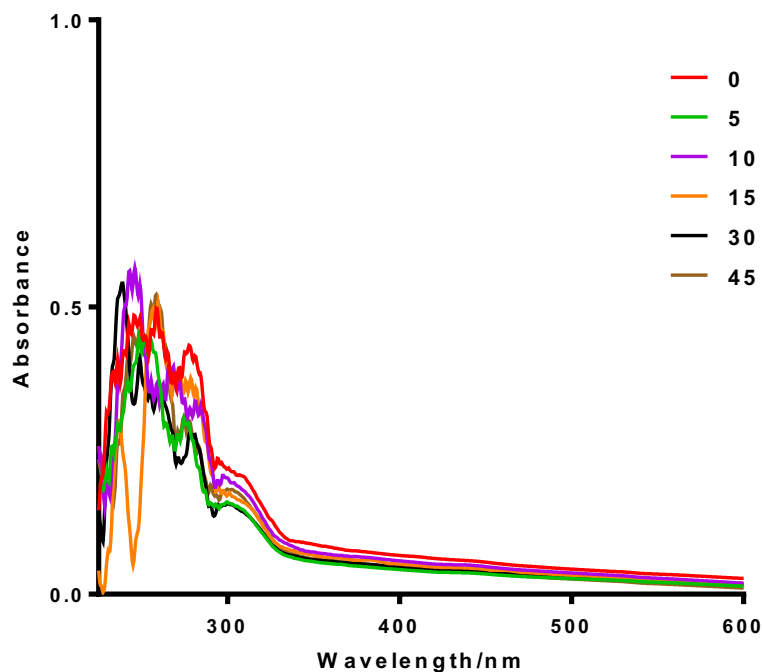

**Figure S47:** UV absorption profile of conjugate 3 incubated with liver microsomes at time points: 0, 5, 10, 15, 30 45minutes.

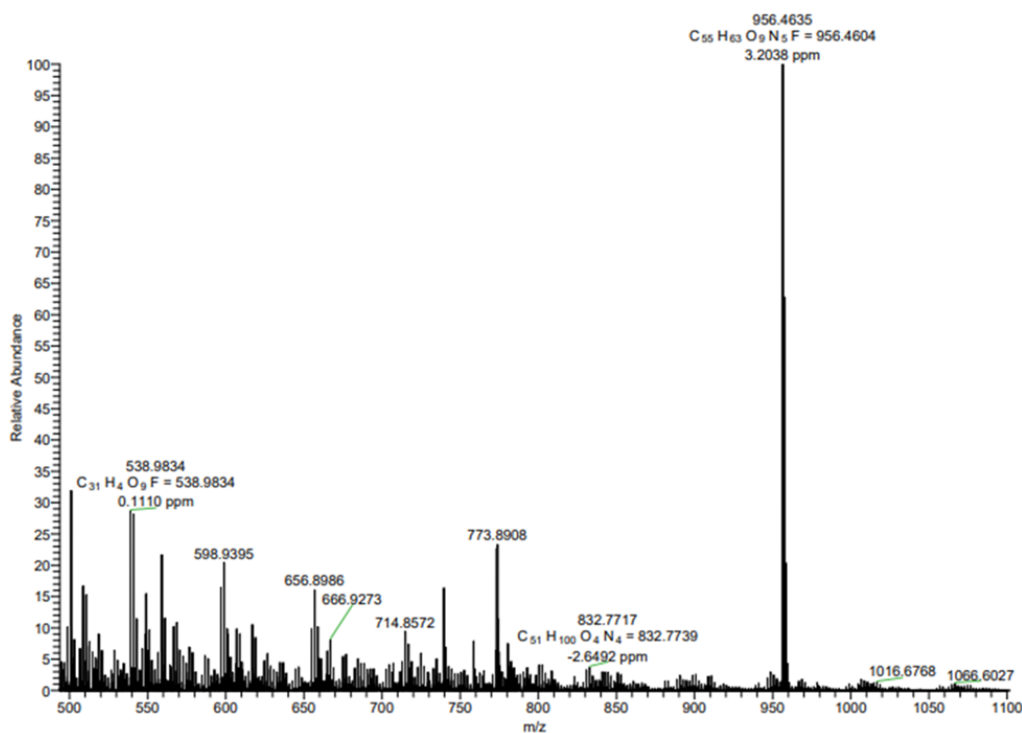

**Figure S48:** Mass spectra of an extract of Conjugate 3-microsome mix after 45minute incubation.
